# Supplementary material for: Pentagonal-bipyramidal dysprosium(iii) complexes with two apical phosphine oxide ligands and equatorial pentadentate N3O2 Schiff-base ligands: breakdown of the apical magnetic axiality by a strong equatorial crystal field
Source: Royal Society of Chemistry journal article supplement (doi:10.1039/d4qi02262a), 2024-11-12
Supplement: d4qi02262a1.pdf [file d4qi02262a1.pdf]

Electronic Supplementary Material (ESI) for Inorganic Chemistry Frontiers.  
This journal is © the Partner Organisations 2024

## Pentagonal-bipyramidal Dysprosium(III) complexes with two apical phosphine oxide ligands and equatorial pentadentate $N_3O_2$ Schiff-base ligands: Breakdown of the apical magnetic axiality by strong equatorial crystal field

Tamara A. Bazhenova,<sup>a</sup> Vyacheslav A. Kopotkov,<sup>a</sup> Denis V. Korchagin,<sup>a</sup> Elena A. Yureva,<sup>a</sup> Mikhail V. Zhidkov,<sup>a</sup> Alexei I. Dmitriev,<sup>a</sup> Ilya A. Yakushev,<sup>b</sup> Nikolay N. Efimov,<sup>b</sup> Konstantin A. Babeshkin,<sup>b</sup> Vladimir S. Mironov\*<sup>c</sup> and Eduard B. Yagubskii\*<sup>a</sup>

<sup>a</sup> Federal Research Centre of Problems of Chemical Physics and Medicinal Chemistry, FRC PCP MC RAS, 1 Academician Semenov av., Chernogolovka, 142432, Russian Federation. E-mail: yagubski@gmail.com

<sup>b</sup> Kurnakov Institute of General and Inorganic Chemistry, IGIC RAS, 31 Leninskii av., Moscow, 119071, Russian Federation.

<sup>c</sup> National Research Center "Kurchatov Institute", 1 Academician Kurchatov sq., Moscow, 123182, Russian Federation. E-mail: mirsa@list.ru

### Table of Contents:

**Figure S1.** Crystal-field splitting patterns of  $Dy^{3+}$  ion arising from (a) apical ligands, (b) equatorial ligands of a pentagonal-bipyramidal Dy complex

**Figure S2.** Infrared spectrum of the complex  $[Dy(L^{CH_3})(Cy_3PO)_2]ClO_4 \cdot CH_3CN$  (**1**)

**Figure S3.** Infrared spectrum of the complex  $[Dy(L^{2(t-Bu)})(Ph_3PO)_2]ClO_4 \cdot C_2H_5OH$  (**2**)

**Table S1** Crystal Data and Structure Refinement for **1-3**

**Figure S5.** Powder X-ray diffraction of the complex  $[Dy(L^{CH_3})(Cy_3PO)_2]ClO_4 \cdot CH_3CN$  (**1**)

**Figure S6.** Powder X-ray diffraction of the complex  $[Dy(L^{2(t-Bu)})(Ph_3PO)_2]ClO_4 \cdot 0.63C_2H_5OH$  (**2**)

**Figure S7.** Powder X-ray diffraction of the complex  $[Dy(L^{OCH_3})(Ph_3PO)_2]ClO_4 \cdot 2H_2O$  (**3**)

**Figure S8.**  $^1H$  NMR and  $^{13}C$  NMR spectra of 3,5 di-*tert*-butylbenzoic acid hydrazide

**Figure S9.**  $^1H$  NMR spectrum for compound  $H_2L^{OCH_3}$

**Figure S10.**  $^{13}C$  NMR spectrum for compound  $H_2L^{OCH_3}$

**Table S2** The local symmetry of Dy(III) ions for **1–3** defined by the continuous shape measure (CShM) analysis with SHAPE software

**Table S3** Main angles for complex **1**

**Table S4** Main angles for complex **2**

**Table S5** Main angles for complex **3**

**Figure S11.**  $\pi$ -stacking interaction in structure **3**

**Figure S12.** Hysteresis loops at different magnetic field sweep rates (50 Oe/s and 150 Oe/s) at temperature 2 K in structure **3**.

**Figure S13.** Hysteresis loops at different temperatures 2 K, 3 K and 5 K and magnetic field sweep rates 50 Oe/s (a) and 150 Oe/s (b) in structure **3**.

**Figure S14.** Frequency dependences of the in-phase ac susceptibility (left panel) and Cole–Cole plots (right panel) for complexes **1–3** at zero dc field and stated temperatures

**Table S6** Best fit parameters for **1** at zero dc field

**Table S7** Best fit parameters for **2** at zero dc field

**Table S8** Best fit parameters for **3** at zero dc field

**Figure S15.** Natural log of the relaxation times  $\tau_1$  and  $\tau_2$  vs the inverse temperature for **1** (a) and **2** (b) at zero dc field

**Figure S16.** Frequency dependences of the in-phase (a) and out-of-phase (b) ac susceptibility, Cole–Cole plots (c) for **1** at 10 K and indicated dc fields

**Table S9** Best fit parameters for **1** at 10 K

**Figure S17.** Frequency dependences of the in-phase (a) and out-of-phase (b) ac susceptibility; (c) Cole–Cole plots for **2** at 8 K and indicated dc fields; (d) field dependence of the relaxation time  $\tau$  at 8 K

**Table S10** Best fit parameters for **2** at 8 K

**Figure S18.** Frequency dependences of the out-of-phase (a) ac susceptibility; (b) field dependence of the relaxation time  $\tau$  for **3** at 10 K

**Table S11** Best fit parameters for **3** at 10 K ( $R^2 = 0.99798$ )

**Figure S19.** Frequency dependences of the in-phase ac susceptibility (left panel) and Cole–Cole plots (right panel) for complexes **1–3** at dc field 1000 Oe and stated temperatures

**Table S12** Best fit parameters for **1** at dc field 1000 Oe

**Table S13** Best fit parameters for **2** at dc field 1000 Oe

**Table S14** Best fit parameters for **3** at dc field 1000 Oe

**Figure S20.** The inverse temperature dependences of the relaxation time  $\tau$  for **2** (a) and **3** (b) at zero dc field (black lines) and 1000 Oe (red lines)

**Table S15** The *ab initio* computed energy levels ( $\text{cm}^{-1}$ ) with g-tensors of the eight lowest KDs for two crystallographic non-equivalent complexes in **1** and **2**

**Table S16** SINGLE\_ANISO computed wave function decomposition analysis for lowest KDs of Dy(III) ions for two crystallographic non-equivalent complexes in **1** and **2**

**Figure S21.** The molecular structures of **1** (a), **2** (b) and **3** (c) together with the easy axes (magenta) of ground KD obtained within the *ab initio* SA-CASSCF/RASSI-SO/SINGLE\_ANISO calculation

**Figure S22.** Computed possible magnetization relaxation pathways for **1** (a), **2** (b) and **3** (c)

**Table S17** The *ab initio* computed CF parameter of complexes **1-3**

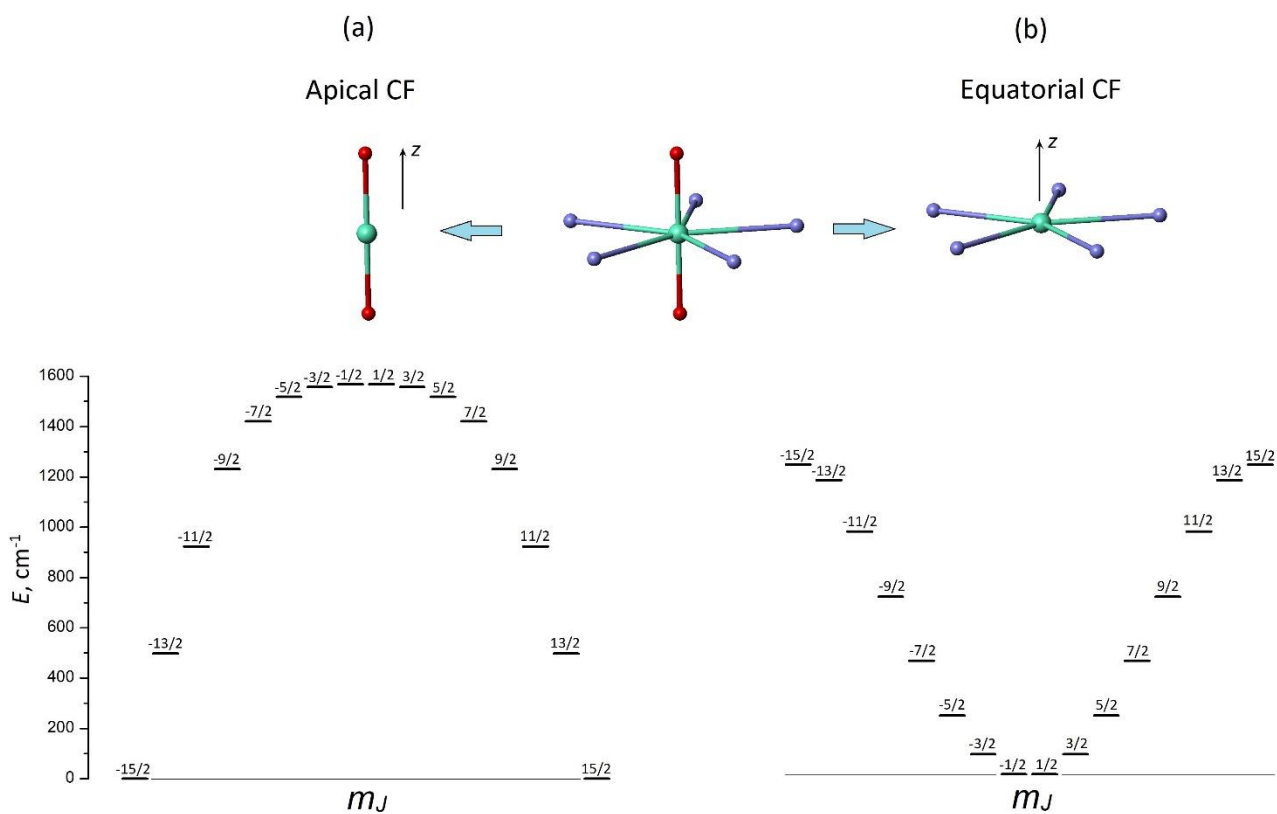

**Figure S1.** Crystal-field splitting patterns of  $Dy^{3+}$  ion arising from (a) apical ligands, (b) equatorial ligands of a pentagonal-bipyramidal Dy complex.

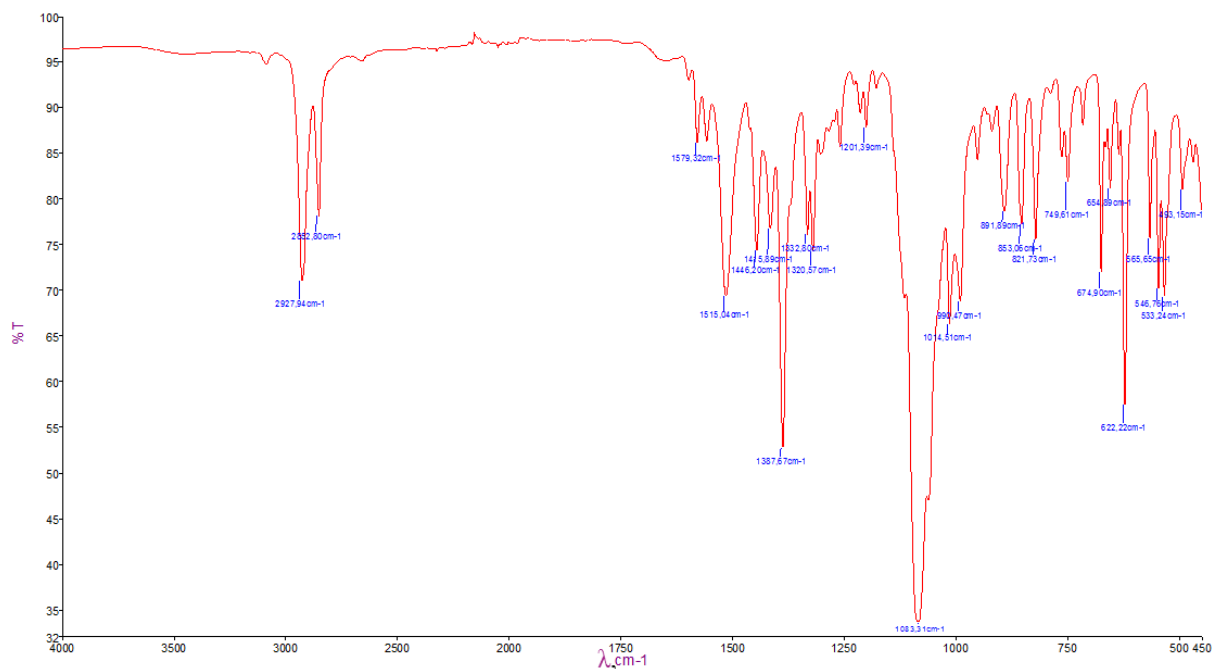

**Figure S2.** Infrared spectrum of the complex  $[Dy(L^{CH_3})(Cy_3PO)_2]ClO_4 \cdot CH_3CN$  (1).

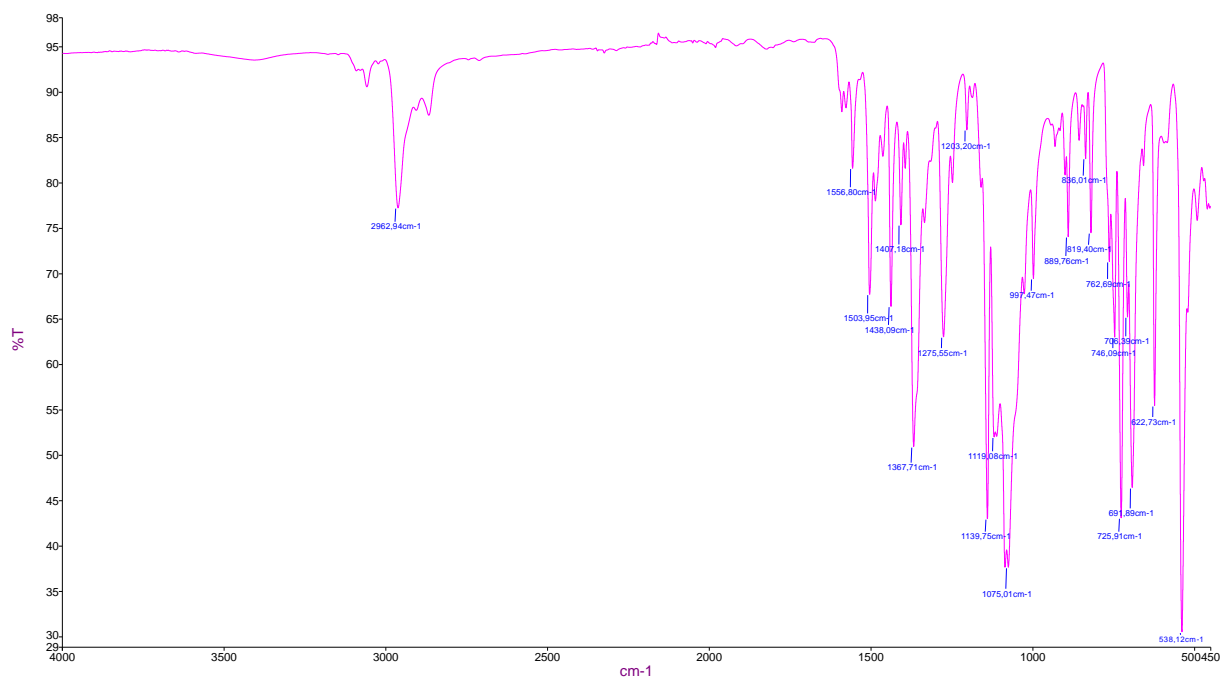

**Figure S3.** Infrared spectrum of the complex  $[\text{Dy}(\text{L}^{2(\text{t-Bu})})(\text{Ph}_3\text{PO})_2]\text{ClO}_4 \cdot \text{C}_2\text{H}_5\text{OH}$  (2).

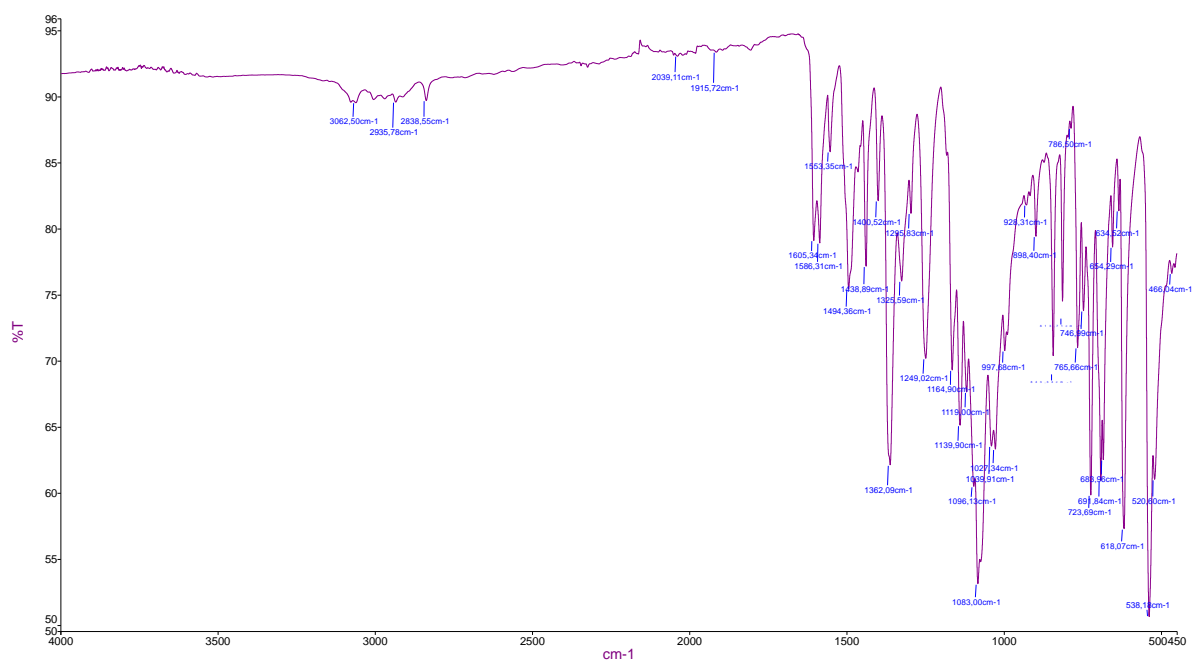

**Figure S4.** Infrared spectrum of the complex  $[\text{Dy}(\text{L}^{\text{OCH}_3})(\text{Ph}_3\text{PO})_2]\text{ClO}_4 \cdot 2\text{H}_2\text{O}$  (3).

**Table S1** Crystal Data and Structure Refinement for **1-3**

| Identification code                                                         | <b>1</b>                                                                         | <b>2</b>                                                                                     | <b>3</b>                                                                          |
|-----------------------------------------------------------------------------|----------------------------------------------------------------------------------|----------------------------------------------------------------------------------------------|-----------------------------------------------------------------------------------|
| CCDC No                                                                     | 2239615                                                                          | 2239616                                                                                      | 2239617                                                                           |
| Empirical formula                                                           | C <sub>51</sub> H <sub>84</sub> ClDyN <sub>6</sub> O <sub>8</sub> P <sub>2</sub> | C <sub>76.268</sub> H <sub>84.804</sub> ClDyN <sub>5</sub> O <sub>8.634</sub> P <sub>2</sub> | C <sub>61</sub> H <sub>57</sub> ClDyN <sub>5</sub> O <sub>12</sub> P <sub>2</sub> |
| Formula weight                                                              | 1169.13                                                                          | 1469.53                                                                                      | 1312.00                                                                           |
| Color                                                                       | yellow                                                                           | yellow                                                                                       | yellow                                                                            |
| Temperature, K                                                              | 100(2)                                                                           | 150                                                                                          | 100(2)                                                                            |
| Crystal size, mm                                                            | 0.420×0.330×0.190                                                                | 0.38×0.21×0.12                                                                               | 0.240×0.180×0.100                                                                 |
| Wavelength, Å                                                               | 0.71073                                                                          | 0.71073                                                                                      | 0.71073                                                                           |
| Crystal system                                                              | Monoclinic                                                                       | Monoclinic                                                                                   | Triclinic                                                                         |
| Space group                                                                 | <i>P</i> 2 <sub>1</sub> / <i>n</i>                                               | <i>P</i> 2 <sub>1</sub> / <i>c</i>                                                           | <i>P</i> -1                                                                       |
| <i>a</i> , Å                                                                | 25.7341(6)                                                                       | 22.8749(7)                                                                                   | 12.2689(5)                                                                        |
| <i>b</i> , Å                                                                | 16.5737(3)                                                                       | 28.3369(8)                                                                                   | 13.1736(6)                                                                        |
| <i>c</i> , Å                                                                | 26.5177(5)                                                                       | 22.9566(7)                                                                                   | 19.6615(9)                                                                        |
| $\alpha$ , deg.                                                             | 90                                                                               | 90                                                                                           | 99.0068(16)                                                                       |
| $\beta$ , deg.                                                              | 101.6240(10)                                                                     | 98.4170(10)                                                                                  | 93.1825(17)                                                                       |
| $\gamma$ , deg.                                                             | 90                                                                               | 90                                                                                           | 113.5421(15)                                                                      |
| <i>V</i> , Å <sup>3</sup>                                                   | 11078.1(4)                                                                       | 14720.3(8)                                                                                   | 2852.8(2)                                                                         |
| <i>Z</i>                                                                    | 8                                                                                | 8                                                                                            | 2                                                                                 |
| Density (calc.), Mg/m <sup>3</sup>                                          | 1.402                                                                            | 1.326                                                                                        | 1.527                                                                             |
| $\mu$ , mm <sup>-1</sup>                                                    | 1.510                                                                            | 1.153                                                                                        | 1.481                                                                             |
| <i>F</i> (000)                                                              | 4872                                                                             | 6075.9                                                                                       | 1334                                                                              |
| Theta range, deg.                                                           | 1.588 – 30.596                                                                   | 1.376 – 29.987                                                                               | 1.826 – 25.350                                                                    |
| Index ranges                                                                | –36 ≤ <i>h</i> ≤ 36,<br>–23 ≤ <i>k</i> ≤ 23,<br>–37 ≤ <i>l</i> ≤ 37              | –32 ≤ <i>h</i> ≤ 32,<br>–39 ≤ <i>k</i> ≤ 39,<br>–32 ≤ <i>l</i> ≤ 32                          | –14 ≤ <i>h</i> ≤ 14,<br>–15 ≤ <i>k</i> ≤ 15,<br>–23 ≤ <i>l</i> ≤ 23               |
| Reflections collected                                                       | 172464                                                                           | 242798                                                                                       | 38607                                                                             |
| Independent reflections                                                     | 33918 ( <i>R</i> <sub>int</sub> = 0.0386)                                        | 42864 ( <i>R</i> <sub>int</sub> = 0.0612)                                                    | 10442 ( <i>R</i> <sub>int</sub> = 0.0447)                                         |
| Reflections observed                                                        | 33918                                                                            | 42864                                                                                        | 10442                                                                             |
| Data / restraints / parameters                                              | 33918 / 0 / 1253                                                                 | 42864 / 742 / 1994                                                                           | 10442 / 216 / 831                                                                 |
| <i>R</i> <sub>1</sub> / <i>wR</i> <sub>2</sub> ( <i>I</i> > 2σ( <i>I</i> )) | <i>R</i> <sub>1</sub> = 0.0273,<br><i>wR</i> <sub>2</sub> = 0.0590               | <i>R</i> <sub>1</sub> = 0.0371,<br><i>wR</i> <sub>2</sub> = 0.0760                           | <i>R</i> <sub>1</sub> = 0.0386,<br><i>wR</i> <sub>2</sub> = 0.0814                |
| <i>R</i> <sub>1</sub> / <i>wR</i> <sub>2</sub> (all data)                   | <i>R</i> <sub>1</sub> = 0.0424,<br><i>wR</i> <sub>2</sub> = 0.0641               | <i>R</i> <sub>1</sub> = 0.0623,<br><i>wR</i> <sub>2</sub> = 0.0841                           | <i>R</i> <sub>1</sub> = 0.0439,<br><i>wR</i> <sub>2</sub> = 0.0834                |
| Goodness-of-fit on <i>F</i> <sup>2</sup>                                    | 1.013                                                                            | 1.015                                                                                        | 1.091                                                                             |
| <i>T</i> <sub>min</sub> / <i>T</i> <sub>max</sub>                           | 0.7461 / 0.6330                                                                  | 0.1182 / 0.0814                                                                              | 0.2125 / 0.1704                                                                   |
| $\Delta\rho_{\max}$ / $\Delta\rho_{\min}$ , e <sup>-</sup> Å <sup>-3</sup>  | –0.787 / 0.601                                                                   | –0.915 / 0.675                                                                               | –1.301 / 1.640                                                                    |

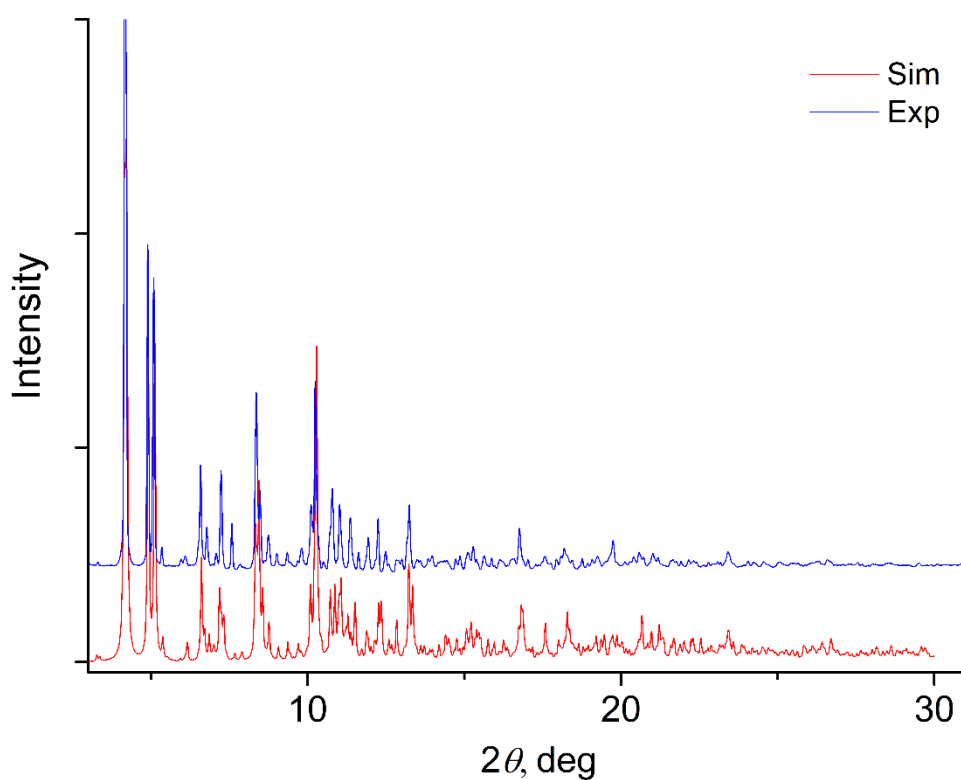

**Figure S5.** Powder X-ray diffraction of the complex  $[\text{Dy}(\text{L}^{\text{CH}_3})(\text{C}_3\text{PO})_2]\text{ClO}_4 \cdot \text{CH}_3\text{CN}$  (**1**).

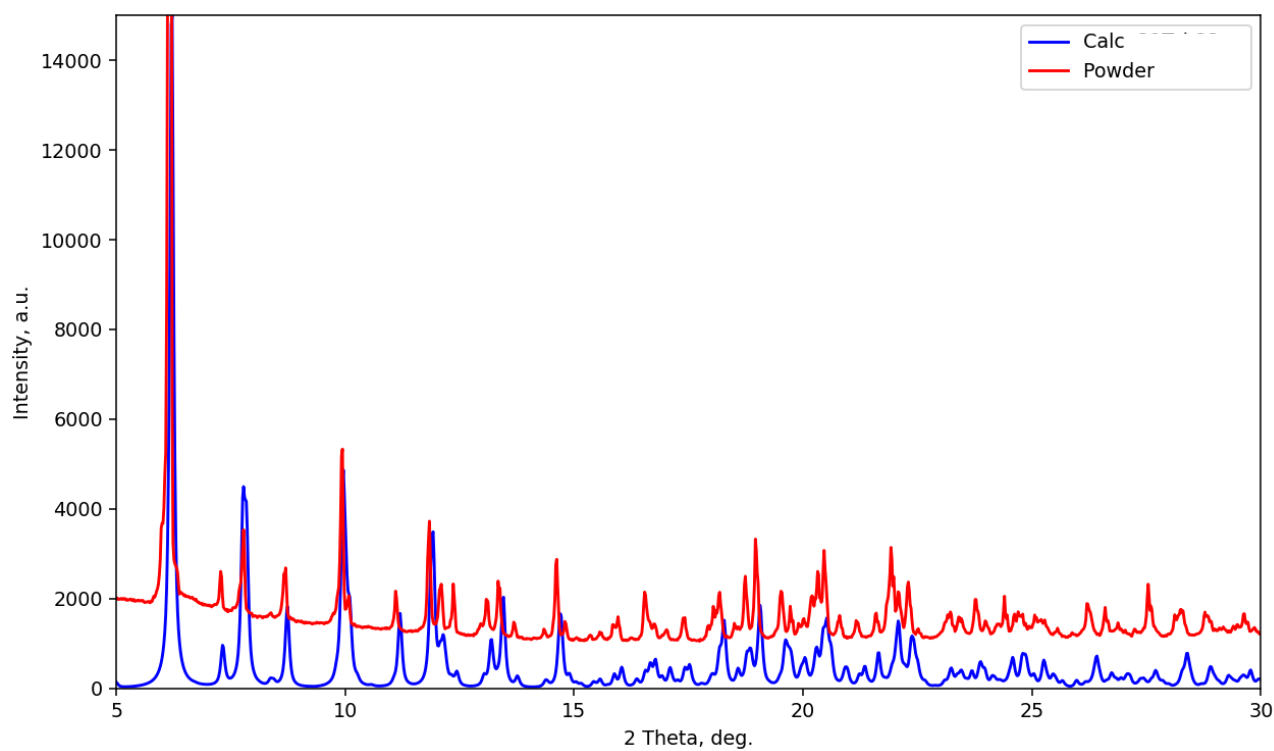

**Figure S6.** Powder X-ray diffraction of the complex  $[\text{Dy}(\text{L}^{2(\text{t-Bu})})(\text{Ph}_3\text{PO})_2]\text{ClO}_4 \cdot 0.63\text{C}_2\text{H}_5\text{OH}$  (**2**).

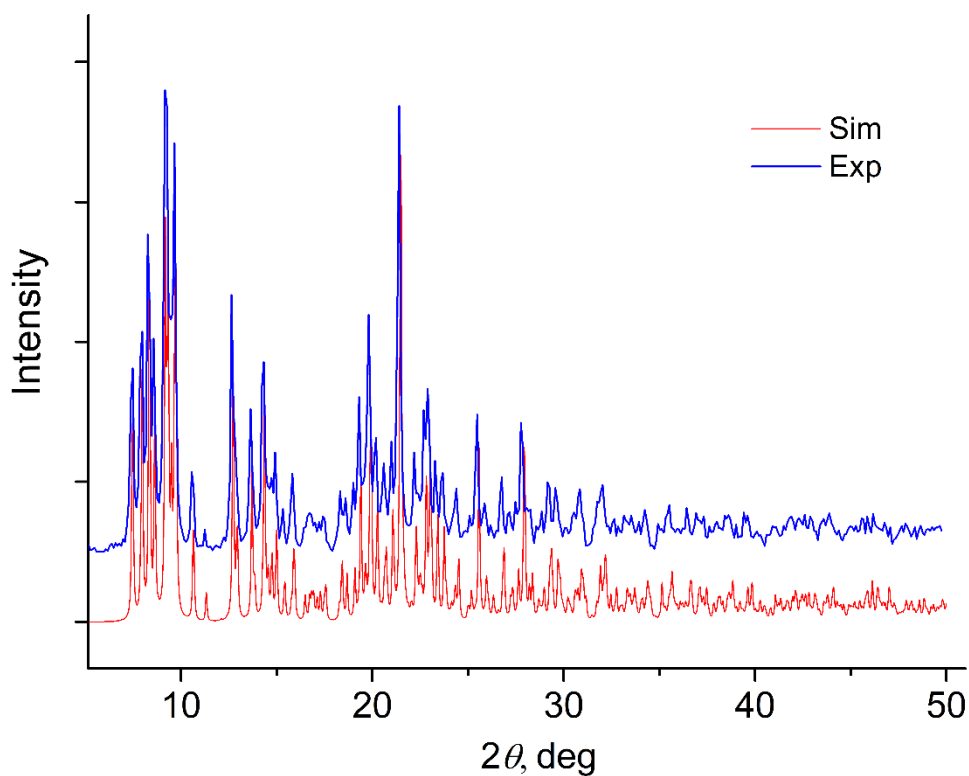

**Figure S7.** Powder X-ray diffraction of the complex  $[\text{Dy}(\text{L}^{\text{OCH}_3})(\text{Ph}_3\text{PO})_2]\text{ClO}_4 \cdot 2\text{H}_2\text{O}$  (**3**)

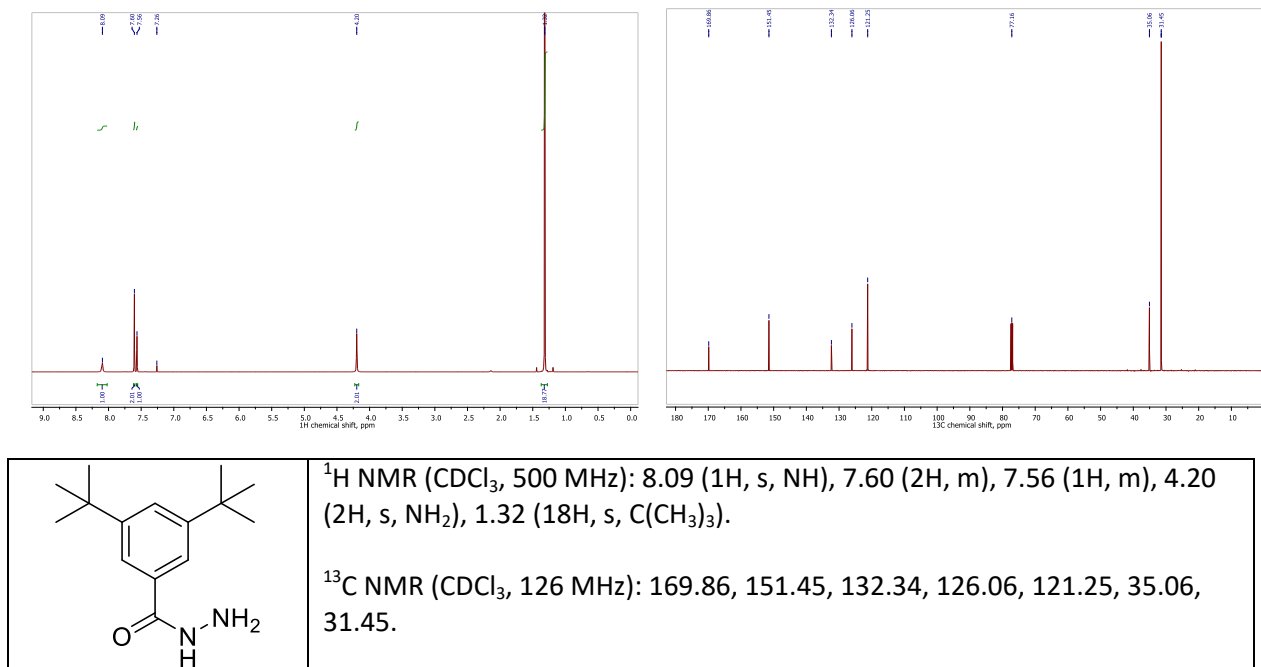

**Figure S8.**  $^1\text{H NMR}$  and  $^{13}\text{C NMR}$  spectra of 3,5 di-*tert*-butylbenzoic acid hydrazide (solvent –  $\text{CDCl}_3$ ).



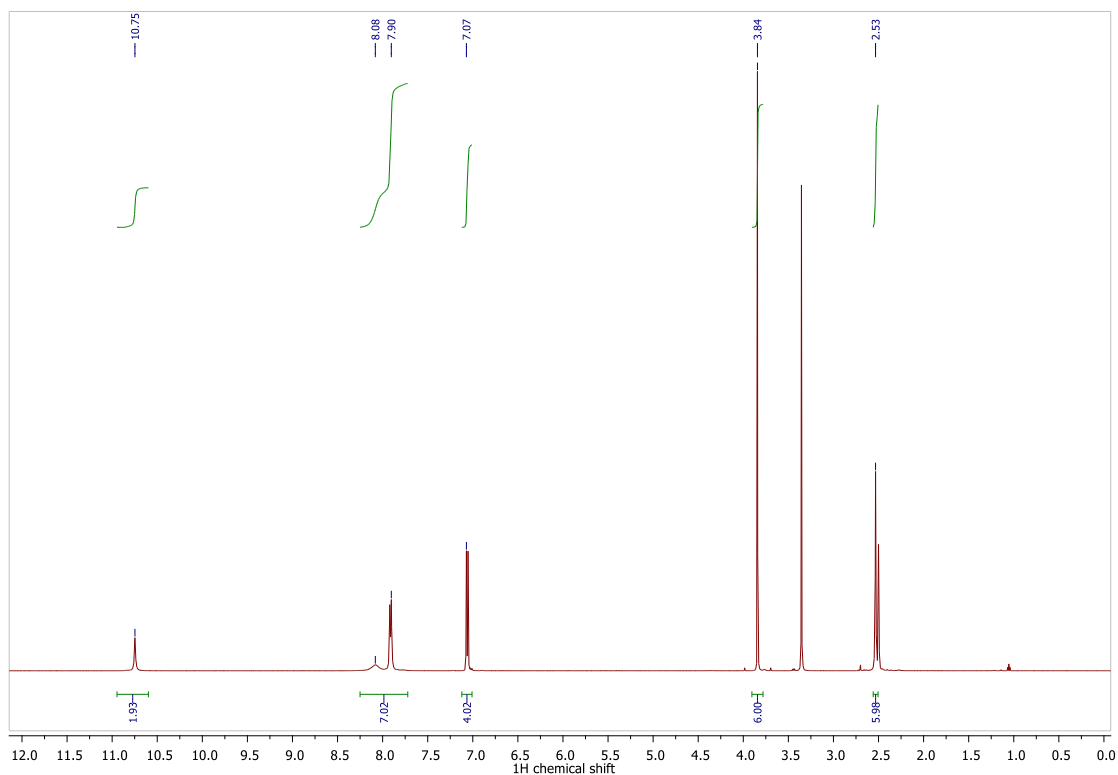

**Figure S9.**  $^1\text{H}$  NMR spectrum for compound  $\text{H}_2\text{L}^{\text{OCH}_3}$  (DMSO- $\text{D}_6$ , 500 MHz),  $\delta$ : 10.75 (2H, s, NH), 8.35-7.54 (3H, m), 7.90 (4H, d), 7.07 (4H, d), 3.84 (6H, s,  $\text{OCH}_3$ ), 2.53 (6H, s,  $\text{CH}_3$ ).

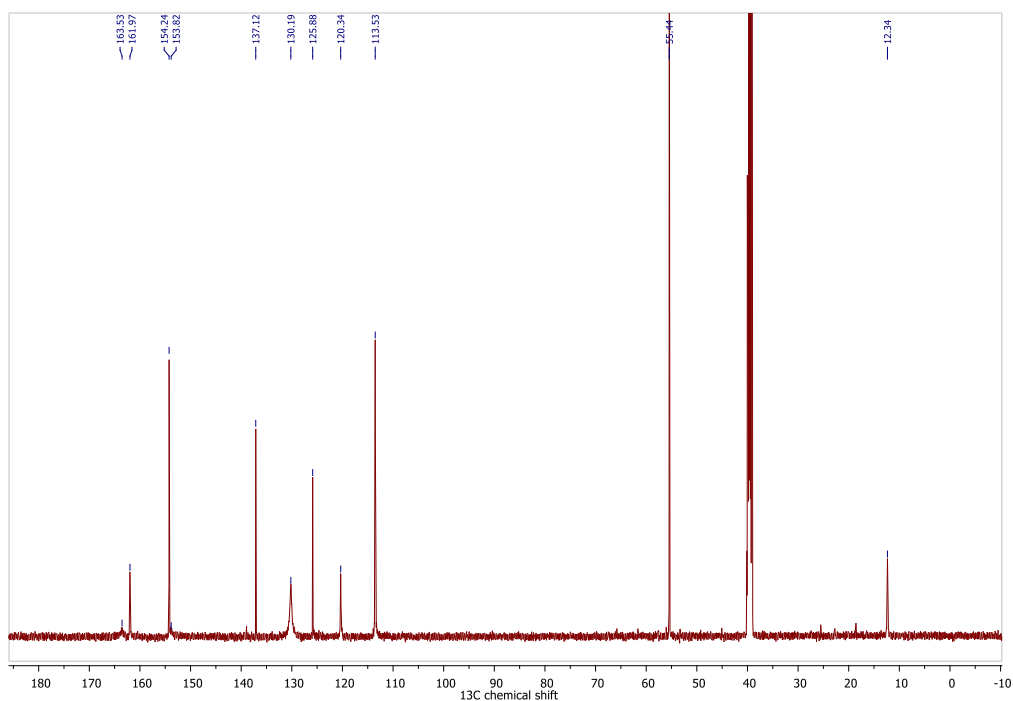

**Figure S10.**  $^{13}\text{C}$  NMR spectrum for compound  $\text{H}_2\text{L}^{\text{OCH}_3}$  (DMSO- $\text{D}_6$ , 126 MHz),  $\delta$ : 163.53, 161.97, 154.24, 153.82, 137.12, 130.19, 125.88, 120.34, 113.53, 55.44, 12.34.

**Table S2** The local symmetry of Dy(III) ions for **1–3** defined by the continuous shape measure (CShM) analysis with SHAPE software

| №        | Polyhedron                              | Symmetry              | <b>1a</b>    | <b>1b</b>    | <b>2a</b>    | <b>2b</b>    | <b>3</b>     |
|----------|-----------------------------------------|-----------------------|--------------|--------------|--------------|--------------|--------------|
| 1        | Heptagon                                | D <sub>7h</sub>       | 32.064       | 32.608       | 32.208       | 32.587       | 31.961       |
| 2        | Hexagonal pyramid                       | C <sub>6v</sub>       | 22.083       | 22.098       | 20.488       | 22.255       | 21.292       |
| <b>3</b> | <b>Pentagonal bipyramid</b>             | <b>D<sub>5h</sub></b> | <b>1.202</b> | <b>1.154</b> | <b>1.569</b> | <b>1.450</b> | <b>1.377</b> |
| 4        | Capped octahedron                       | C <sub>3v</sub>       | 8.111        | 8.271        | 7.927        | 8.247        | 8.064        |
| 5        | Capped trigonal prism                   | C <sub>2v</sub>       | 6.336        | 6.708        | 6.414        | 6.624        | 6.356        |
| 6        | Johnson pentagonal bipyramid J13        | D <sub>5h</sub>       | 3.909        | 3.893        | 4.339        | 4.142        | 4.298        |
| 7        | Johnson elongated triangular pyramid J7 | C <sub>3v</sub>       | 21.717       | 21.931       | 20.177       | 20.416       | 19.991       |

**Table S3** Main angles for complex **1**

| Bonds           | Angles, ° | Bonds             | Angles, ° |
|-----------------|-----------|-------------------|-----------|
| O(1)–Dy(1)–O(2) | 99.62(4)  | O(1A)–Dy(2)–N(2A) | 65.40(4)  |
| O(1)–Dy(1)–N(2) | 65.04(4)  | O(1A)–Dy(2)–N(3A) | 130.64(4) |
| O(1)–Dy(1)–N(3) | 129.77(4) | O(1A)–Dy(2)–N(4A) | 164.36(5) |
| O(1)–Dy(1)–N(4) | 164.98(4) | O(2A)–Dy(2)–O(1A) | 99.40(4)  |
| O(2)–Dy(1)–N(2) | 164.65(4) | O(2A)–Dy(2)–N(2A) | 164.76(4) |
| O(2)–Dy(1)–N(3) | 130.53(4) | O(2A)–Dy(2)–N(3A) | 129.95(4) |
| O(2)–Dy(1)–N(4) | 65.43(4)  | O(2A)–Dy(2)–N(4A) | 64.97(4)  |
| O(3)–Dy(1)–O(1) | 93.38(4)  | O(3A)–Dy(2)–O(1A) | 92.00(4)  |
| O(3)–Dy(1)–O(2) | 91.98(4)  | O(3A)–Dy(2)–O(2A) | 92.34(4)  |
| O(3)–Dy(1)–N(2) | 89.68(4)  | O(3A)–Dy(2)–N(2A) | 87.34(4)  |
| O(3)–Dy(1)–N(3) | 83.59(4)  | O(3A)–Dy(2)–N(3A) | 85.93(4)  |
| O(3)–Dy(1)–N(4) | 85.94(4)  | O(3A)–Dy(2)–N(4A) | 88.22(4)  |
| O(4)–Dy(1)–O(1) | 93.73(4)  | O(4A)–Dy(2)–O(1A) | 93.59(4)  |
| O(4)–Dy(1)–O(2) | 92.41(4)  | O(4A)–Dy(2)–O(2A) | 93.08(4)  |
| O(4)–Dy(1)–O(3) | 170.91(4) | O(4A)–Dy(2)–O(3A) | 171.49(4) |
| O(4)–Dy(1)–N(2) | 88.18(4)  | O(4A)–Dy(2)–N(2A) | 89.14(4)  |
| O(4)–Dy(1)–N(3) | 87.51(4)  | O(4A)–Dy(2)–N(3A) | 85.56(4)  |
| O(4)–Dy(1)–N(4) | 88.66(4)  | O(4A)–Dy(2)–N(4A) | 88.14(4)  |
| N(2)–Dy(1)–N(3) | 64.82(4)  | N(2A)–Dy(2)–N(3A) | 65.24(5)  |
| N(4)–Dy(1)–N(2) | 129.91(4) | N(2A)–Dy(2)–N(4A) | 130.21(5) |
| N(4)–Dy(1)–N(3) | 65.11(4)  | N(3A)–Dy(2)–N(4A) | 64.98(5)  |

**Table S4** Main angles for complex **2**.

| Bonds           | Angles, ° | Bonds             | Angles, ° |
|-----------------|-----------|-------------------|-----------|
| O(1)–Dy(1)–N(2) | 65.34(6)  | O(1A)–Dy(2)–O(2A) | 101.52(5) |
| O(1)–Dy(1)–N(3) | 129.65(6) | O(1A)–Dy(2)–N(2A) | 64.79(6)  |
| O(1)–Dy(1)–N(4) | 166.12(7) | O(1A)–Dy(2)–N(3A) | 128.82(6) |
| O(2)–Dy(1)–O(1) | 101.12(6) | O(1A)–Dy(2)–N(4A) | 165.17(6) |
| O(2)–Dy(1)–N(2) | 164.77(7) | O(2A)–Dy(2)–N(2A) | 165.09(6) |
| O(2)–Dy(1)–N(3) | 129.08(7) | O(2A)–Dy(2)–N(3A) | 129.67(6) |
| O(2)–Dy(1)–N(4) | 65.17(7)  | O(2A)–Dy(2)–N(4A) | 65.08(6)  |
| O(3)–Dy(1)–O(1) | 93.08(6)  | O(3A)–Dy(2)–O(1A) | 97.08(6)  |
| O(3)–Dy(1)–O(2) | 87.46(6)  | O(3A)–Dy(2)–O(2A) | 89.28(6)  |
| O(3)–Dy(1)–O(4) | 176.71(6) | O(3A)–Dy(2)–O(4A) | 169.96(6) |
| O(3)–Dy(1)–N(2) | 86.41(7)  | O(3A)–Dy(2)–N(2A) | 86.77(6)  |
| O(3)–Dy(1)–N(3) | 86.39(7)  | O(3A)–Dy(2)–N(3A) | 85.03(6)  |
| O(3)–Dy(1)–N(4) | 88.58(7)  | O(3A)–Dy(2)–N(4A) | 89.36(6)  |
| O(4)–Dy(1)–O(1) | 87.34(6)  | O(4A)–Dy(2)–O(1A) | 90.40(6)  |
| O(4)–Dy(1)–O(2) | 95.67(6)  | O(4A)–Dy(2)–O(2A) | 95.81(6)  |
| O(4)–Dy(1)–N(2) | 90.80(7)  | O(4A)–Dy(2)–N(2A) | 90.39(6)  |
| O(4)–Dy(1)–N(3) | 90.82(7)  | O(4A)–Dy(2)–N(3A) | 85.06(6)  |
| O(4)–Dy(1)–N(4) | 91.80(7)  | O(4A)–Dy(2)–N(4A) | 84.97(6)  |
| N(2)–Dy(1)–N(3) | 64.38(7)  | N(3A)–Dy(2)–N(2A) | 64.29(6)  |
| N(2)–Dy(1)–N(4) | 128.53(7) | N(4A)–Dy(2)–N(2A) | 129.18(6) |
| N(4)–Dy(1)–N(3) | 64.19(7)  | N(4A)–Dy(2)–N(3A) | 64.89(6)  |

**Table S5** Main angles for complex **3**

| Bonds           | Angles, °  | Bonds           | Angles, °  |
|-----------------|------------|-----------------|------------|
| O(1)–Dy(1)–N(2) | 65.05(10)  | O(5)–Dy(1)–N(4) | 87.94(10)  |
| O(1)–Dy(1)–N(3) | 130.10(10) | O(6)–Dy(1)–O(1) | 91.18(9)   |
| O(1)–Dy(1)–N(4) | 164.61(10) | O(6)–Dy(1)–O(2) | 88.00(10)  |
| O(2)–Dy(1)–O(1) | 99.48(9)   | O(6)–Dy(1)–O(5) | 174.43(10) |
| O(2)–Dy(1)–O(5) | 91.97(10)  | O(6)–Dy(1)–N(2) | 85.13(11)  |
| O(2)–Dy(1)–N(2) | 162.86(10) | O(6)–Dy(1)–N(3) | 83.25(11)  |
| O(2)–Dy(1)–N(3) | 129.62(10) | O(6)–Dy(1)–N(4) | 86.99(10)  |
| O(2)–Dy(1)–N(4) | 65.21(10)  | N(2)–Dy(1)–N(3) | 65.07(11)  |
| O(5)–Dy(1)–O(1) | 94.32(9)   | N(2)–Dy(1)–N(4) | 129.87(11) |
| O(5)–Dy(1)–N(2) | 96.38(11)  | N(3)–Dy(1)–N(4) | 64.86(11)  |
| O(5)–Dy(1)–N(3) | 92.51(11)  |                 |            |

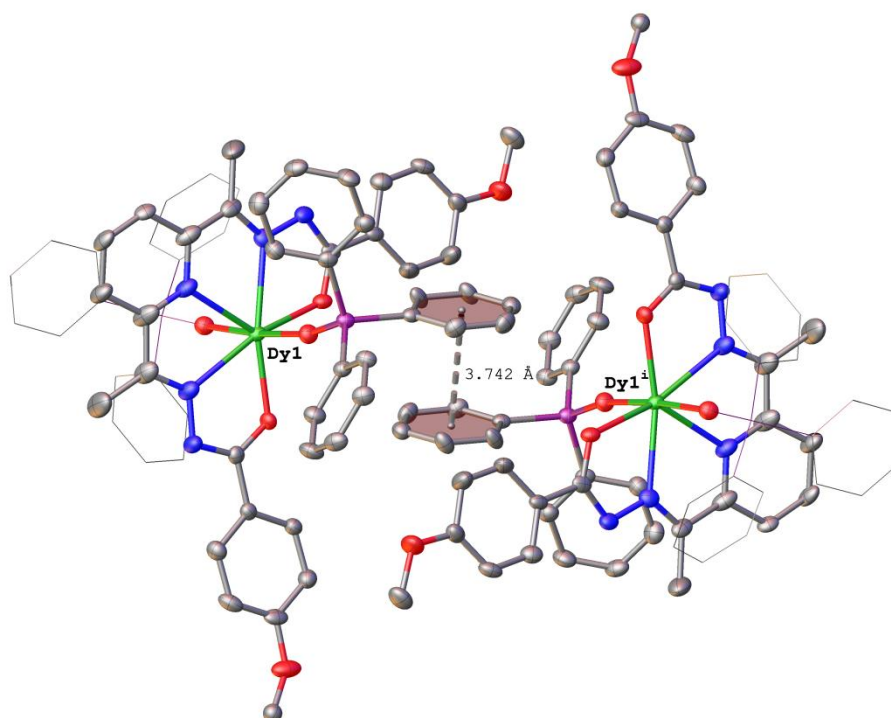**Figure S11.**  $\pi$ -stacking interaction in structure **3**.

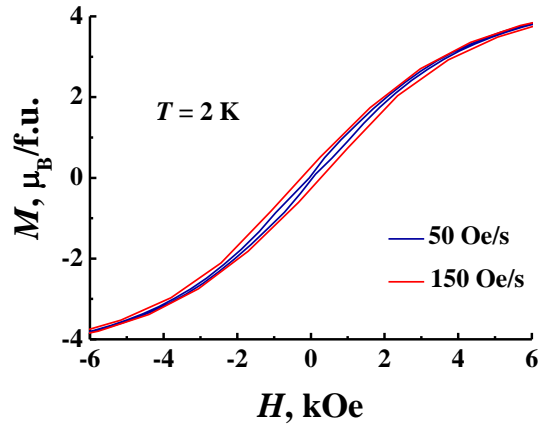

**Figure S12.** Hysteresis loops at different magnetic field sweep rates (50 Oe/s and 150 Oe/s) at temperature 2 K in structure **3**.

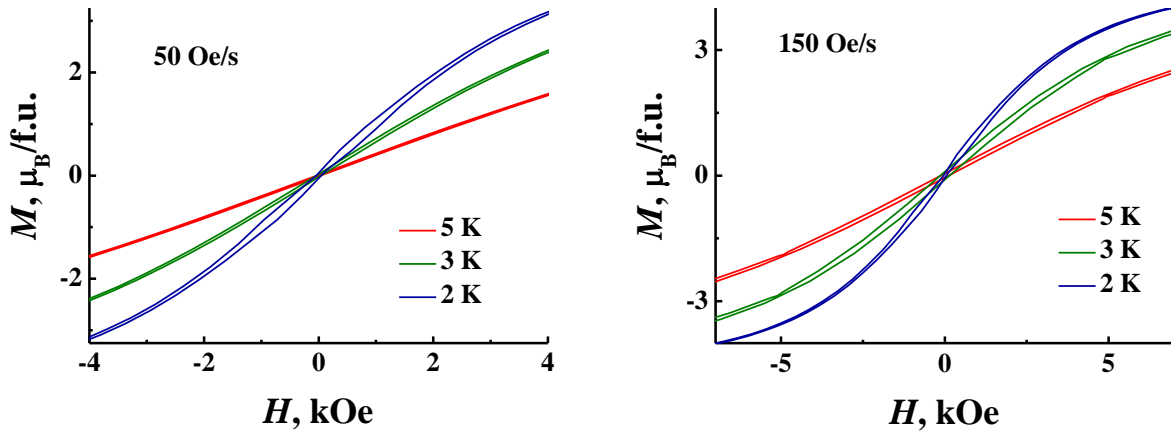

**Figure S13.** Hysteresis loops at different temperatures 2 K, 3 K and 5 K and magnetic field sweep rates 50 Oe/s (a) and 150 Oe/s (b) in structure **3**.

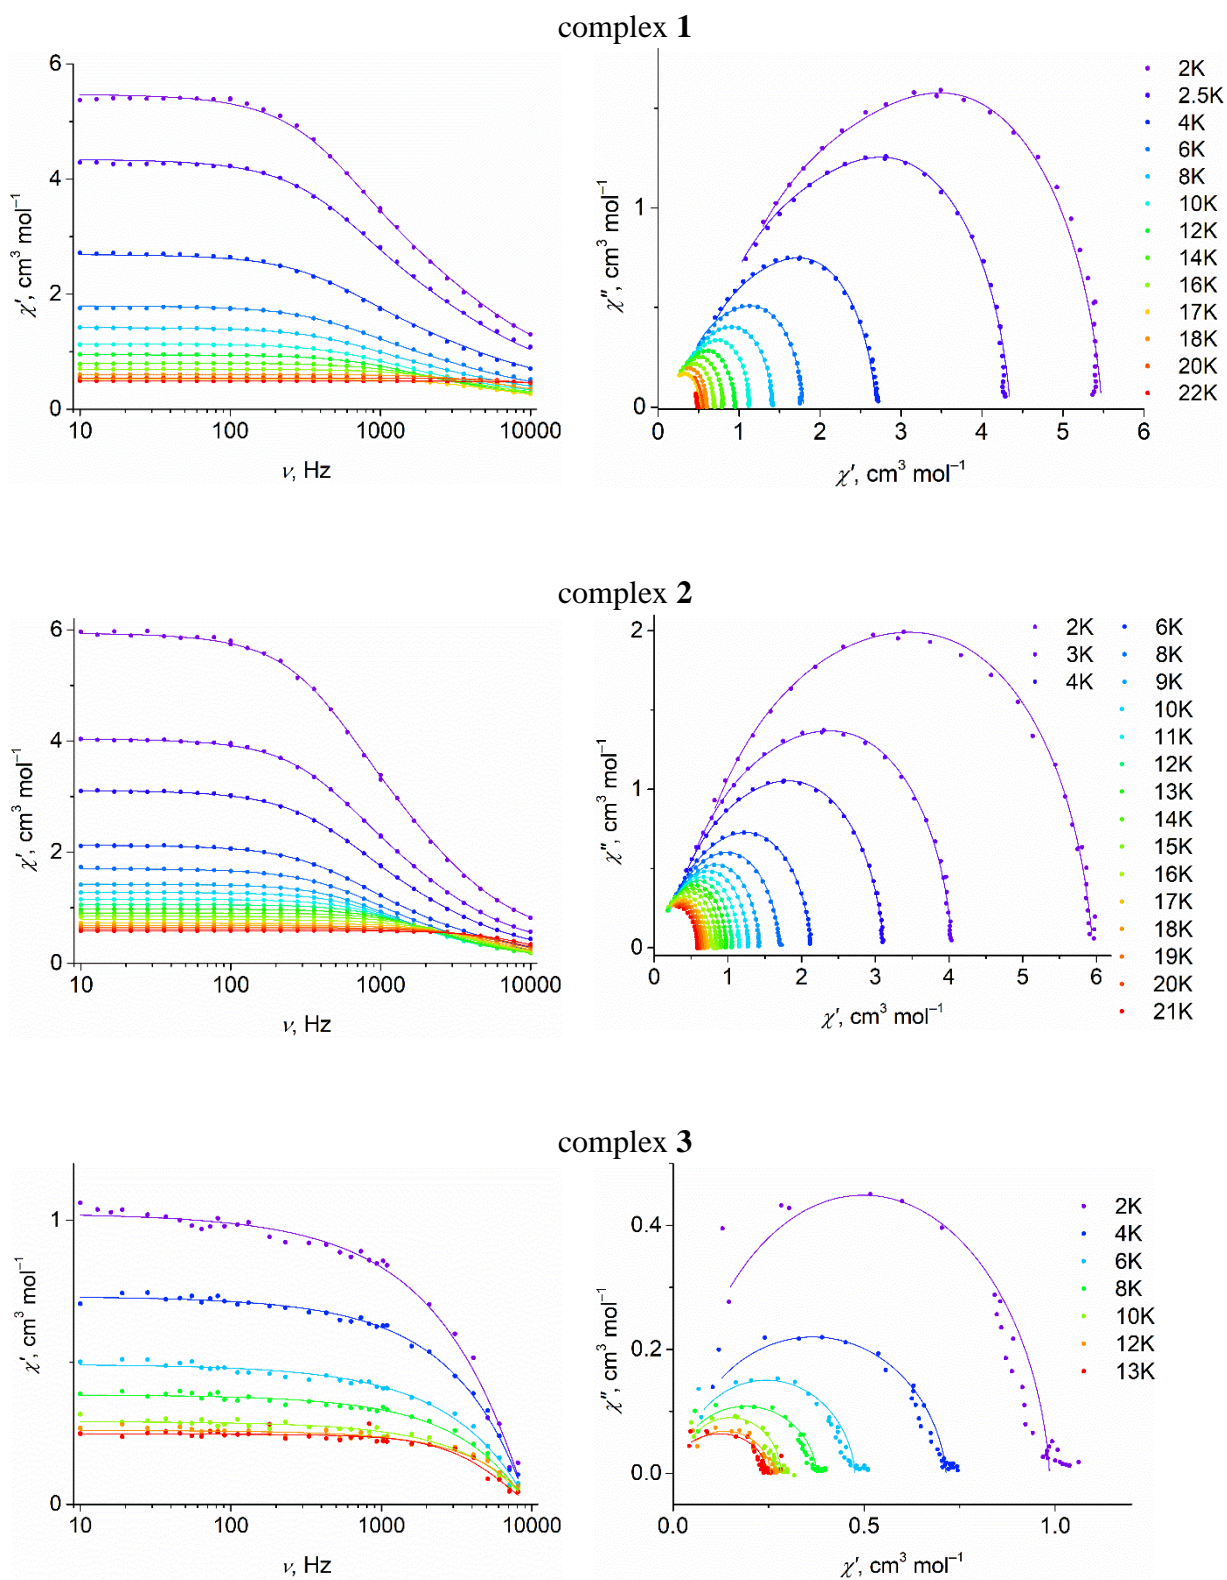

**Figure S14.** Frequency dependences of the in-phase ac susceptibility (left panel) and Cole–Cole plots (right panel) for complexes **1–3** at zero dc field and stated temperatures. Dots are experimental data; solid lines indicate fit data with parameters listed in Tables S6–S8.

**Table S6** Best fit parameters for **1** at zero dc field ( $R^2 = 0.99978$ )\*

| $T, \text{K}$ | $\chi_S, \text{cm}^3 \text{mol}^{-1}$ | $\Delta\chi_{T1}, \text{cm}^3 \text{mol}^{-1}$ | $\tau_1, \text{s}$   | $\alpha_1$ | $\Delta\chi_{T2}, \text{cm}^3 \text{mol}^{-1}$ | $\tau_2, \text{s}$   | $\alpha_2$ |
|---------------|---------------------------------------|------------------------------------------------|----------------------|------------|------------------------------------------------|----------------------|------------|
| 2             | 0.611                                 | 2.440                                          | $2.42 \cdot 10^{-4}$ | 0.080      | 2.431                                          | $3.89 \cdot 10^{-5}$ | 0.223      |
| 2.5           | 0.490                                 | 1.993                                          | $2.30 \cdot 10^{-4}$ | 0.087      | 1.866                                          | $3.71 \cdot 10^{-5}$ | 0.217      |
| 4             | 0.385                                 | 1.145                                          | $2.28 \cdot 10^{-4}$ | 0.082      | 1.162                                          | $3.82 \cdot 10^{-5}$ | 0.223      |
| 6             | 0.254                                 | 0.713                                          | $2.10 \cdot 10^{-4}$ | 0.075      | 0.832                                          | $3.93 \cdot 10^{-5}$ | 0.217      |
| 8             | 0.235                                 | 0.615                                          | $1.84 \cdot 10^{-4}$ | 0.078      | 0.570                                          | $3.60 \cdot 10^{-5}$ | 0.202      |
| 10            | 0.164                                 | 0.567                                          | $1.42 \cdot 10^{-4}$ | 0.069      | 0.407                                          | $2.42 \cdot 10^{-5}$ | 0.223      |
| 12            | 0.140                                 | 0.517                                          | $1.06 \cdot 10^{-4}$ | 0.069      | 0.289                                          | $1.62 \cdot 10^{-5}$ | 0.222      |
| 14            | 0.114                                 | 0.487                                          | $6.89 \cdot 10^{-5}$ | 0.070      | 0.201                                          | $1.04 \cdot 10^{-5}$ | 0.206      |
| 16            | 0.131                                 | 0.458                                          | $3.99 \cdot 10^{-5}$ | 0.071      | 0.106                                          | $5.27 \cdot 10^{-6}$ | 0.174      |
| 17            | 0.139                                 | 0.389                                          | $2.63 \cdot 10^{-5}$ | 0.082      | –                                              | –                    | –          |
| 18            | 0.178                                 | 0.422                                          | $1.96 \cdot 10^{-5}$ | 0.047      | –                                              | –                    | –          |
| 20            | 0.177                                 | 0.366                                          | $8.65 \cdot 10^{-6}$ | 0.042      | –                                              | –                    | –          |
| 22            | 0.204                                 | 0.286                                          | $3.72 \cdot 10^{-6}$ | 0.083      | –                                              | –                    | –          |

\* at temperatures above 17 K, the data were fitted by the generalized Debye model

**Table S7** Best fit parameters for **2** at zero dc field ( $R^2 = 0.99987$ )

| $T, \text{K}$ | $\chi_S, \text{cm}^3 \text{mol}^{-1}$ | $\Delta\chi_{T1}, \text{cm}^3 \text{mol}^{-1}$ | $\tau_1, \text{s}$    | $\alpha_1$ | $\Delta\chi_{T2}, \text{cm}^3 \text{mol}^{-1}$ | $\tau_2, \text{s}$    | $\alpha_2$ |
|---------------|---------------------------------------|------------------------------------------------|-----------------------|------------|------------------------------------------------|-----------------------|------------|
| 2             | 0.350                                 | 2.179                                          | $2.843 \cdot 10^{-4}$ | 0.032      | 3.423                                          | $7.460 \cdot 10^{-5}$ | 0.2        |
| 3             | 0.222                                 | 1.703                                          | $2.650 \cdot 10^{-4}$ | 0.038      | 2.121                                          | $6.623 \cdot 10^{-5}$ | 0.2        |
| 4             | 0.164                                 | 1.543                                          | $2.468 \cdot 10^{-4}$ | 0.067      | 1.409                                          | $5.799 \cdot 10^{-5}$ | 0.2        |
| 6             | 0.108                                 | 1.128                                          | $2.272 \cdot 10^{-4}$ | 0.070      | 0.893                                          | $5.222 \cdot 10^{-5}$ | 0.2        |
| 8             | 0.087                                 | 0.980                                          | $1.868 \cdot 10^{-4}$ | 0.070      | 0.638                                          | $4.620 \cdot 10^{-5}$ | 0.2        |
| 9             | 0.061                                 | 0.788                                          | $1.639 \cdot 10^{-4}$ | 0.027      | 0.577                                          | $4.065 \cdot 10^{-5}$ | 0.2        |
| 10            | 0.057                                 | 0.703                                          | $1.381 \cdot 10^{-4}$ | 0.015      | 0.519                                          | $3.926 \cdot 10^{-5}$ | 0.2        |
| 11            | 0.049                                 | 0.629                                          | $1.149 \cdot 10^{-4}$ | 0.007      | 0.478                                          | $3.656 \cdot 10^{-5}$ | 0.2        |
| 12            | 0.025                                 | 0.712                                          | $8.900 \cdot 10^{-5}$ | 0.018      | 0.321                                          | $2.036 \cdot 10^{-5}$ | 0.2        |
| 13            | 0.032                                 | 0.640                                          | $7.461 \cdot 10^{-5}$ | 0.008      | 0.305                                          | $2.131 \cdot 10^{-5}$ | 0.2        |
| 14            | 0.002                                 | 0.611                                          | $6.264 \cdot 10^{-5}$ | 0.001      | 0.294                                          | $1.453 \cdot 10^{-5}$ | 0.2        |
| 15            | 0.006                                 | 0.631                                          | $4.934 \cdot 10^{-5}$ | 0.016      | 0.210                                          | $1.034 \cdot 10^{-5}$ | 0.2        |
| 16            | 0.001                                 | 0.592                                          | $4.176 \cdot 10^{-5}$ | 0.046      | 0.196                                          | $1.068 \cdot 10^{-5}$ | 0.2        |
| 17            | 0.001                                 | 0.548                                          | $3.417 \cdot 10^{-5}$ | 0.022      | 0.172                                          | $7.965 \cdot 10^{-6}$ | 0.2        |
| 18            | 0.001                                 | 0.509                                          | $2.865 \cdot 10^{-5}$ | 0.012      | 0.168                                          | $7.067 \cdot 10^{-6}$ | 0.2        |
| 19            | 0.001                                 | 0.512                                          | $2.317 \cdot 10^{-5}$ | 0.016      | 0.132                                          | $4.864 \cdot 10^{-6}$ | 0.2        |
| 20            | 0.001                                 | 0.503                                          | $1.926 \cdot 10^{-5}$ | 0.018      | 0.112                                          | $3.147 \cdot 10^{-6}$ | 0.2        |
| 21            | 0.001                                 | 0.498                                          | $1.536 \cdot 10^{-5}$ | 0.020      | 0.089                                          | $2.276 \cdot 10^{-6}$ | 0.2        |



**Table S8** Best fit parameters for **3** at zero dc field ( $R^2 = 0.99952$ )

| $T, \text{K}$ | $\chi_s, \text{cm}^3 \text{mol}^{-1}$ | $\Delta\chi_T, \text{cm}^3 \text{mol}^{-1}$ | $\tau, \text{s}$      | $\alpha$ |
|---------------|---------------------------------------|---------------------------------------------|-----------------------|----------|
| 2             | 0.102                                 | 0.998                                       | $4.617 \cdot 10^{-5}$ | 0.067    |
| 4             | 0.073                                 | 0.493                                       | $4.458 \cdot 10^{-5}$ | 0.073    |
| 6             | 0.049                                 | 0.327                                       | $4.299 \cdot 10^{-5}$ | 0.053    |
| 8             | 0.038                                 | 0.234                                       | $4.140 \cdot 10^{-5}$ | 0.049    |
| 10            | 0.029                                 | 0.182                                       | $3.980 \cdot 10^{-5}$ | 0.007    |
| 12            | 0.026                                 | 0.134                                       | $3.662 \cdot 10^{-5}$ | 0.005    |
| 13            | 0.024                                 | 0.128                                       | $3.184 \cdot 10^{-5}$ | 0.006    |

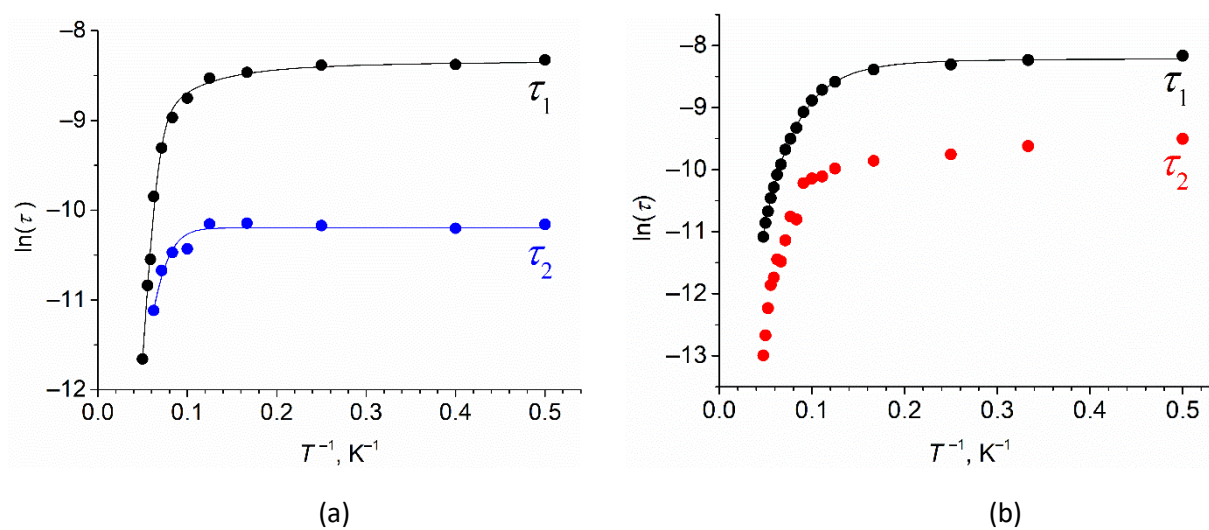**Figure S15.** Natural log of the relaxation times  $\tau_1$  and  $\tau_2$  vs the inverse temperature for **1** (a) and **2** (b) at zero dc field.

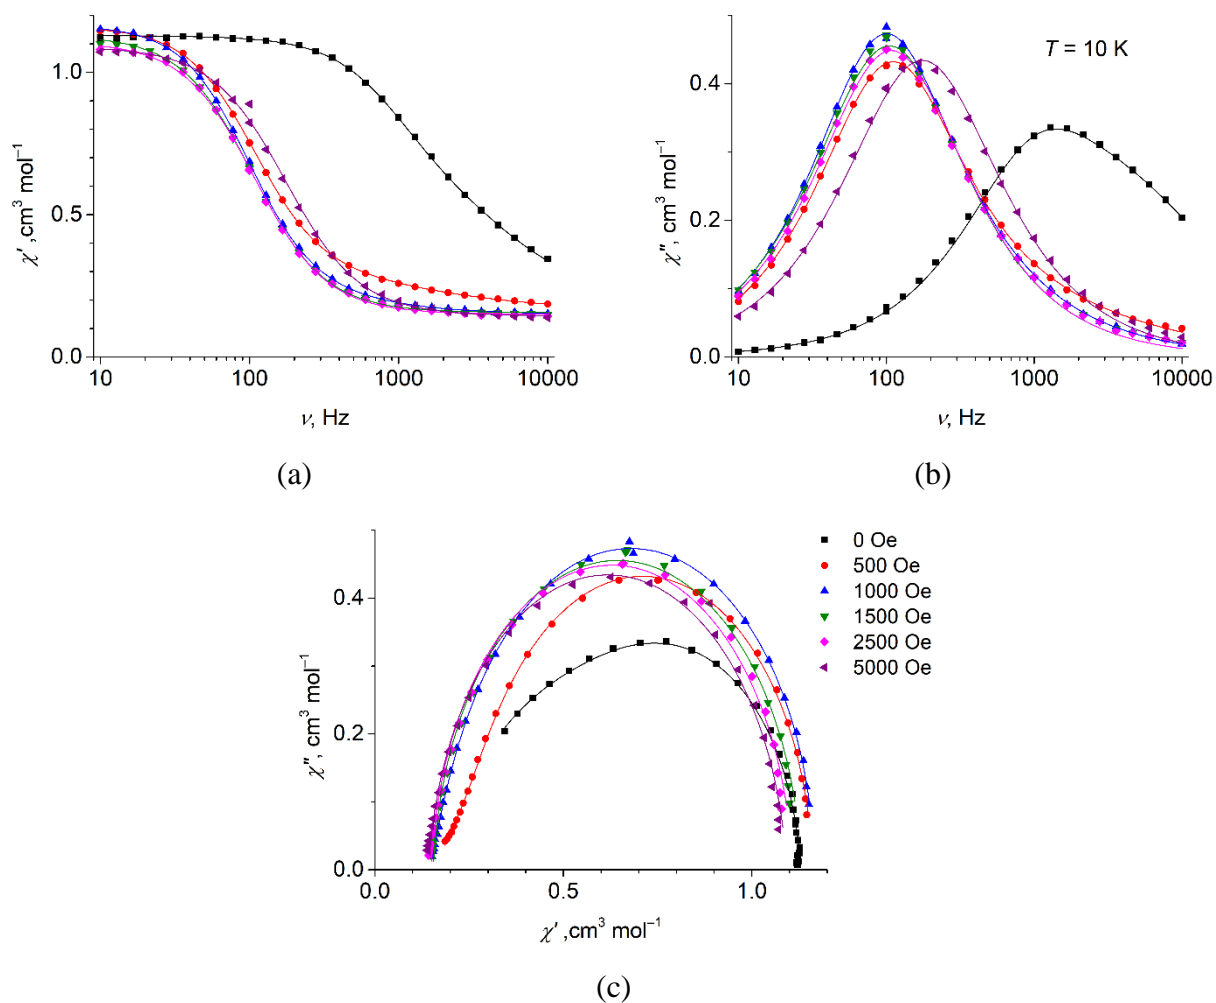

**Figure S16.** Frequency dependences of the in-phase (a) and out-of-phase (b) ac susceptibility, Cole–Cole plots (c) for **1** at 10 K and indicated dc fields. Symbols are experimental data; solid lines indicate fits.

**Table S9** Best fit parameters for **1** at 10 K ( $R^2 = 0.99972$ )

| $H$ , Oe | $\chi_s$ ,<br>$\text{cm}^3 \text{mol}^{-1}$ | $\Delta\chi_{T1}$ ,<br>$\text{cm}^3 \text{mol}^{-1}$ | $\tau_1$ , s          | $\alpha_1$ | $\Delta\chi_{T2}$ ,<br>$\text{cm}^3 \text{mol}^{-1}$ | $\tau_2$ , s          | $\alpha_2$ |
|----------|---------------------------------------------|------------------------------------------------------|-----------------------|------------|------------------------------------------------------|-----------------------|------------|
| 0        | 0.195                                       | 0.503                                                | $1.554 \cdot 10^{-4}$ | 0.036      | 0.432                                                | $2.927 \cdot 10^{-5}$ | 0.167      |
| 500      | 0.159                                       | 0.836                                                | $1.470 \cdot 10^{-3}$ | 0.017      | 0.168                                                | $1.406 \cdot 10^{-4}$ | 0.378      |
| 1000     | 0.147                                       | 0.916                                                | $1.620 \cdot 10^{-3}$ | 0.010      | —                                                    | —                     | —          |
| 1500     | 0.155                                       | 0.977                                                | $1.520 \cdot 10^{-3}$ | 0.045      | —                                                    | —                     | —          |
| 2500     | 0.150                                       | 0.958                                                | $1.470 \cdot 10^{-3}$ | 0.042      | —                                                    | —                     | —          |
| 5000     | 0.143                                       | 0.949                                                | $9.095 \cdot 10^{-4}$ | 0.057      | —                                                    | —                     | —          |

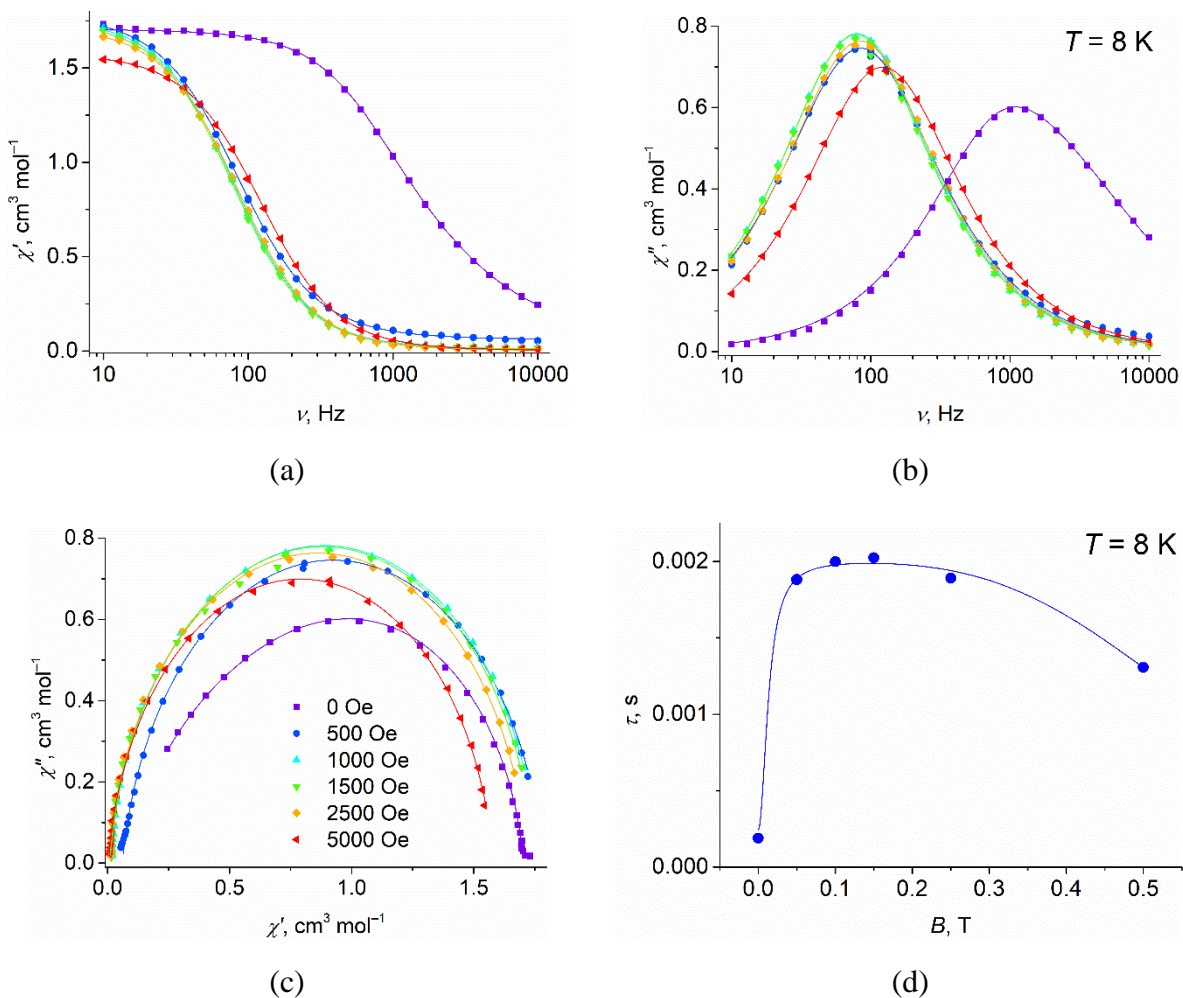

**Figure S17.** Frequency dependences of the in-phase (a) and out-of-phase (b) ac susceptibility; (c) Cole–Cole plots for **2** at 8 K and indicated dc fields; (d) field dependence of the relaxation time  $\tau$  at 8 K. Symbols are experimental data; solid lines indicate fits.

**Table S10** Best fit parameters for **2** at 8 K ( $R^2 = 0.99982$ )

| $H$ , Oe | $\chi_s$ ,<br>cm <sup>3</sup> mol <sup>-1</sup> | $\Delta\chi_{T1}$ ,<br>cm <sup>3</sup> mol <sup>-1</sup> | $\tau_1$ , s          | $\alpha_1$ | $\Delta\chi_{T2}$ ,<br>cm <sup>3</sup> mol <sup>-1</sup> | $\tau_2$ , s          | $\alpha_2$ |
|----------|-------------------------------------------------|----------------------------------------------------------|-----------------------|------------|----------------------------------------------------------|-----------------------|------------|
| 0        | 0.086                                           | 0.950                                                    | $1.885 \cdot 10^{-4}$ | 0.066      | 0.670                                                    | $4.822 \cdot 10^{-5}$ | 0.202      |
| 500      | 0.061                                           | 1.727                                                    | $1.880 \cdot 10^{-3}$ | 0.093      | —                                                        | —                     | —          |
| 1000     | 0.010                                           | 1.757                                                    | $2.000 \cdot 10^{-3}$ | 0.074      | —                                                        | —                     | —          |
| 1500     | 0.009                                           | 1.744                                                    | $2.020 \cdot 10^{-3}$ | 0.071      | —                                                        | —                     | —          |
| 2500     | 0.002                                           | 1.721                                                    | $1.890 \cdot 10^{-3}$ | 0.076      | —                                                        | —                     | —          |
| 5000     | 0.002                                           | 1.578                                                    | $1.310 \cdot 10^{-3}$ | 0.077      | —                                                        | —                     | —          |

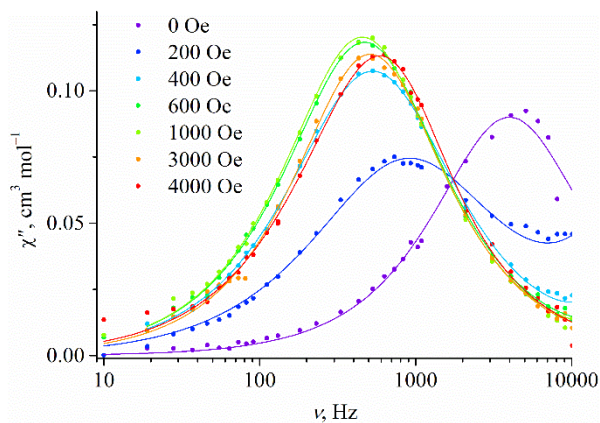

(a)

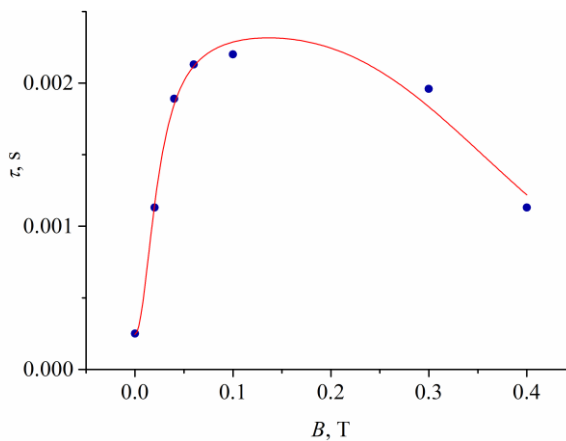

(b)

**Figure S18.** Frequency dependences of the out-of-phase (a) ac susceptibility; (b) field dependence of the relaxation time  $\tau$  for **3** at 10 K. Symbols are experimental data; solid lines indicate fits.

**Table S11** Best fit parameters for **3** at 10 K ( $R^2 = 0.99798$ )

| $H$ , Oe | $\chi_s$ , $\text{cm}^3 \text{mol}^{-1}$ | $\Delta\chi_T$ , $\text{cm}^3 \text{mol}^{-1}$ | $\tau$ , s            | $\alpha$ |
|----------|------------------------------------------|------------------------------------------------|-----------------------|----------|
| 0        | 0.029                                    | 0.182                                          | $3.980 \cdot 10^{-5}$ | 0.007    |
| 200      | 0.022                                    | 0.181                                          | $1.799 \cdot 10^{-4}$ | 0.134    |
| 400      | 0.027                                    | 0.235                                          | $3.009 \cdot 10^{-4}$ | 0.058    |
| 600      | 0.028                                    | 0.248                                          | $3.391 \cdot 10^{-4}$ | 0.031    |
| 1000     | 0.020                                    | 0.249                                          | $3.503 \cdot 10^{-4}$ | 0.023    |
| 3000     | 0.025                                    | 0.229                                          | $3.121 \cdot 10^{-4}$ | 0.004    |
| 4000     | 0.027                                    | 0.219                                          | $1.799 \cdot 10^{-4}$ | 0.074    |

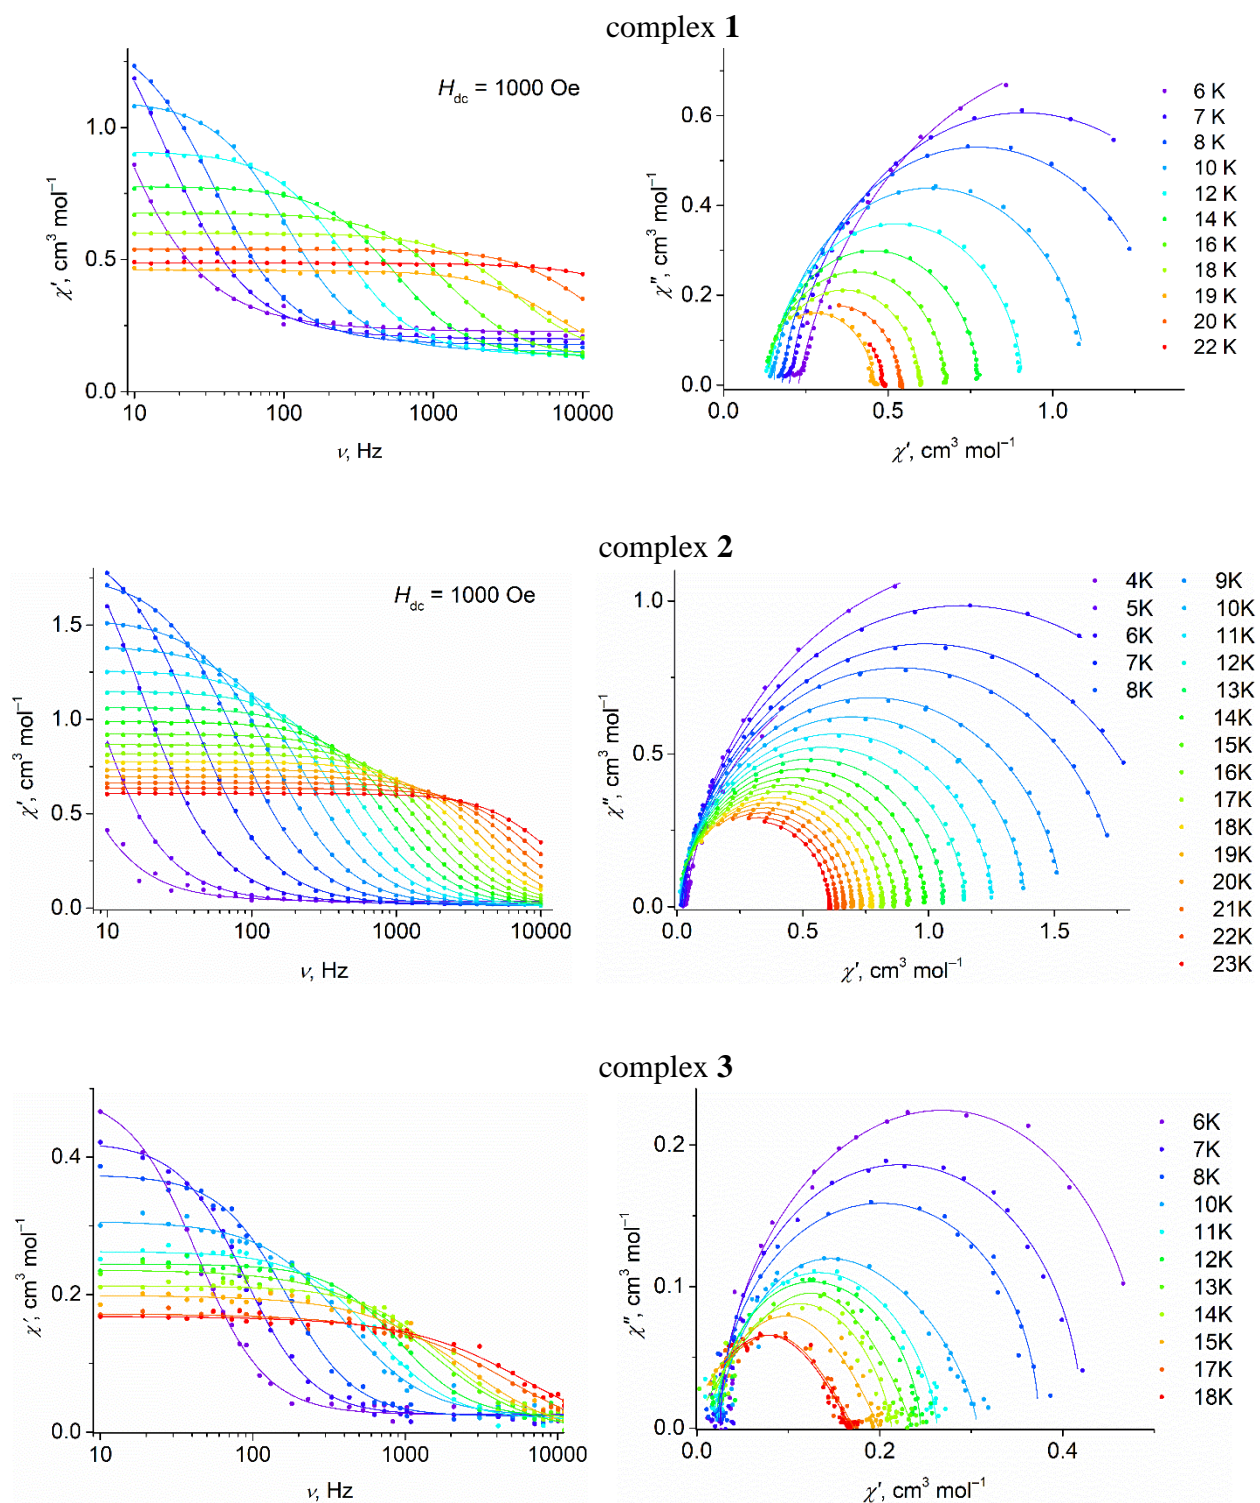

**Figure S19.** Frequency dependences of the in-phase ac susceptibility (left panel) and Cole–Cole plots (right panel) for complexes 1–3 at dc field 1000 Oe and stated temperatures. Dots are experimental data; solid lines indicate fit data with parameters listed in Tables S12–S14.

**Table S12** Best fit parameters for **1** at dc field 1000 Oe ( $R^2 = 0.99949$ )

| $T, \text{K}$ | $\chi_S, \text{cm}^3 \text{mol}^{-1}$ | $\Delta\chi_T, \text{cm}^3 \text{mol}^{-1}$ | $\tau, \text{s}$      | $\alpha$ |
|---------------|---------------------------------------|---------------------------------------------|-----------------------|----------|
| 6             | 0.227                                 | 1.864                                       | $2.677 \cdot 10^{-2}$ | 0.159    |
| 7             | 0.199                                 | 1.423                                       | $9.640 \cdot 10^{-3}$ | 0.101    |
| 8             | 0.178                                 | 1.189                                       | $4.640 \cdot 10^{-3}$ | 0.073    |
| 10            | 0.152                                 | 0.953                                       | $1.520 \cdot 10^{-3}$ | 0.053    |
| 12            | 0.138                                 | 0.773                                       | $6.367 \cdot 10^{-4}$ | 0.046    |
| 14            | 0.131                                 | 0.645                                       | $2.908 \cdot 10^{-4}$ | 0.048    |
| 16            | 0.130                                 | 0.546                                       | $1.238 \cdot 10^{-4}$ | 0.051    |
| 18            | 0.131                                 | 0.469                                       | $4.487 \cdot 10^{-5}$ | 0.065    |
| 19            | 0.097                                 | 0.363                                       | $2.359 \cdot 10^{-5}$ | 0.076    |
| 20            | 0.153                                 | 0.386                                       | $1.564 \cdot 10^{-5}$ | 0.057    |
| 22            | 0.035                                 | 0.452                                       | $3.079 \cdot 10^{-6}$ | 0.131    |

**Table S13** Best fit parameters for **2** at dc field 1000 Oe ( $R^2 = 0.99893$ )

| $T, \text{K}$ | $\chi_S, \text{cm}^3 \text{mol}^{-1}$ | $\Delta\chi_T, \text{cm}^3 \text{mol}^{-1}$ | $\tau, \text{s}$      | $\alpha$ |
|---------------|---------------------------------------|---------------------------------------------|-----------------------|----------|
| 4             | 0.034                                 | 1.785                                       | $3.615 \cdot 10^{-2}$ | 0.070    |
| 5             | 0.024                                 | 2.545                                       | $2.393 \cdot 10^{-2}$ | 0.077    |
| 6             | 0.017                                 | 2.233                                       | $9.130 \cdot 10^{-3}$ | 0.080    |
| 7             | 0.013                                 | 1.952                                       | $4.010 \cdot 10^{-3}$ | 0.080    |
| 8             | 0.010                                 | 1.757                                       | $2.000 \cdot 10^{-3}$ | 0.074    |
| 9             | 0.009                                 | 1.526                                       | $1.110 \cdot 10^{-3}$ | 0.069    |
| 10            | 0.008                                 | 1.382                                       | $6.739 \cdot 10^{-4}$ | 0.067    |
| 11            | 0.004                                 | 1.257                                       | $4.372 \cdot 10^{-4}$ | 0.067    |
| 12            | 0.007                                 | 1.144                                       | $2.928 \cdot 10^{-4}$ | 0.058    |
| 13            | 0.004                                 | 1.061                                       | $2.067 \cdot 10^{-4}$ | 0.058    |
| 14            | 0.006                                 | 0.983                                       | $1.509 \cdot 10^{-4}$ | 0.055    |
| 15            | 0.006                                 | 0.917                                       | $1.126 \cdot 10^{-4}$ | 0.053    |
| 16            | 0.007                                 | 0.859                                       | $8.570 \cdot 10^{-5}$ | 0.047    |
| 17            | 0.007                                 | 0.811                                       | $6.624 \cdot 10^{-5}$ | 0.046    |
| 18            | 0.011                                 | 0.763                                       | $5.178 \cdot 10^{-5}$ | 0.042    |
| 19            | 0.010                                 | 0.724                                       | $4.009 \cdot 10^{-5}$ | 0.039    |
| 20            | 0.014                                 | 0.683                                       | $3.149 \cdot 10^{-5}$ | 0.034    |
| 21            | 0.015                                 | 0.649                                       | $2.421 \cdot 10^{-5}$ | 0.035    |
| 22            | 0.019                                 | 0.616                                       | $1.855 \cdot 10^{-5}$ | 0.034    |
| 23            | 0.021                                 | 0.587                                       | $1.402 \cdot 10^{-5}$ | 0.032    |



**Table S14** Best fit parameters for **3** at dc field 1000 Oe ( $R^2 = 0.99892$ )

| $T, K$ | $\chi_S, \text{cm}^3 \text{mol}^{-1}$ | $\Delta\chi_T, \text{cm}^3 \text{mol}^{-1}$ | $\tau, \text{s}$      | $\alpha$ |
|--------|---------------------------------------|---------------------------------------------|-----------------------|----------|
| 6      | 0.026                                 | 0.454                                       | $0.386 \cdot 10^{-2}$ | 0.007    |
| 7      | 0.025                                 | 0.375                                       | $0.178 \cdot 10^{-2}$ | 0.005    |
| 8      | 0.022                                 | 0.327                                       | $9.649 \cdot 10^{-4}$ | 0.020    |
| 10     | 0.020                                 | 0.249                                       | $3.503 \cdot 10^{-4}$ | 0.023    |
| 11     | 0.017                                 | 0.225                                       | $2.356 \cdot 10^{-4}$ | 0.017    |
| 12     | 0.020                                 | 0.209                                       | $1.656 \cdot 10^{-4}$ | 0.007    |
| 13     | 0.015                                 | 0.194                                       | $1.226 \cdot 10^{-4}$ | 0.011    |
| 14     | 0.011                                 | 0.181                                       | $9.235 \cdot 10^{-5}$ | 0.019    |
| 15     | 0.013                                 | 0.166                                       | $6.687 \cdot 10^{-5}$ | 0.030    |
| 17     | 0.012                                 | 0.143                                       | $3.662 \cdot 10^{-5}$ | 0.057    |
| 18     | 0.011                                 | 0.141                                       | $2.707 \cdot 10^{-5}$ | 0.091    |

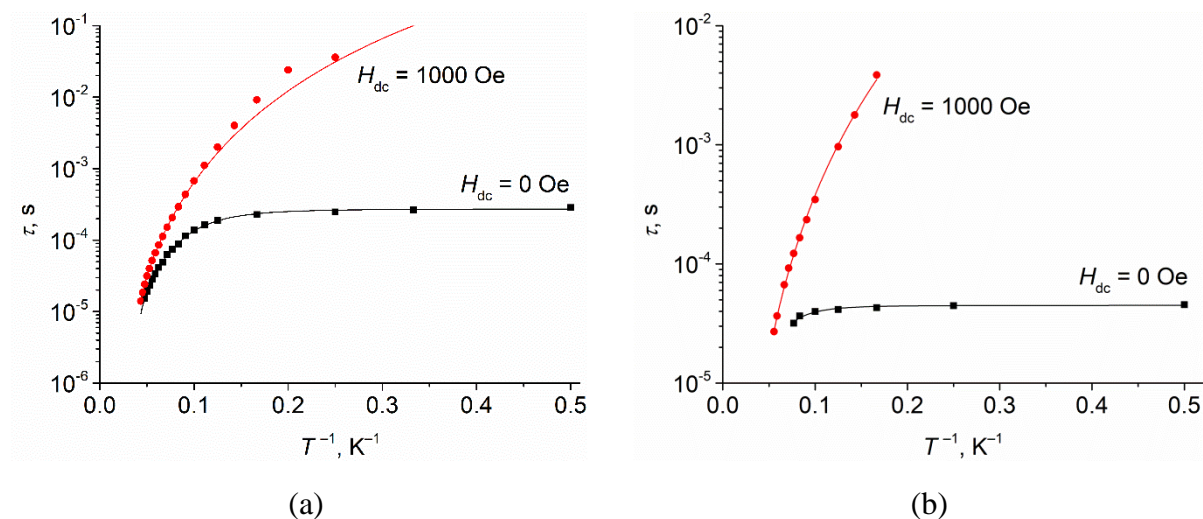**Figure S20.** The inverse temperature dependences of the relaxation time  $\tau$  for **2** (a) and **3** (b) at zero dc field (black lines) and 1000 Oe (red lines).**Table S15** The *ab initio* computed energy levels ( $\text{cm}^{-1}$ ) with g-tensors of the eight lowest KDs for two crystallographic non-equivalent complexes in **1** and **2**

| KD       | <b>1a</b> |       |       |        | <b>1b</b> |       |       |        |
|----------|-----------|-------|-------|--------|-----------|-------|-------|--------|
|          | Energy    | $g_x$ | $g_y$ | $g_z$  | Energy    | $g_x$ | $g_y$ | $g_z$  |
| <b>1</b> | 0.0       | 0.026 | 0.073 | 19.610 | 0.0       | 0.029 | 0.076 | 19.602 |
| <b>2</b> | 162.9     | 1.834 | 2.844 | 12.024 | 162.8     | 2.136 | 2.402 | 12.551 |
| <b>3</b> | 191.5     | 1.882 | 2.618 | 15.032 | 197.7     | 1.215 | 4.217 | 13.929 |
| <b>4</b> | 227.8     | 0.115 | 1.794 | 6.850  | 229.7     | 1.225 | 1.900 | 5.615  |
| <b>5</b> | 387.5     | 1.949 | 4.848 | 11.858 | 390.6     | 1.853 | 4.870 | 11.836 |
| <b>6</b> | 420.7     | 1.022 | 3.420 | 15.062 | 427.2     | 1.125 | 3.415 | 15.216 |
| <b>7</b> | 510.9     | 2.289 | 2.796 | 12.286 | 514.2     | 2.296 | 2.575 | 12.226 |
| <b>8</b> | 650.1     | 0.314 | 0.816 | 17.496 | 651.5     | 0.321 | 0.872 | 17.436 |

| KD | 2a     |       |       |        | 2b     |       |       |        |
|----|--------|-------|-------|--------|--------|-------|-------|--------|
|    | Energy | $g_x$ | $g_y$ | $g_z$  | Energy | $g_x$ | $g_y$ | $g_z$  |
| 1  | 0.0    | 0.030 | 0.064 | 19.691 | 0.0    | 0.018 | 0.040 | 19.720 |
| 2  | 187.8  | 1.125 | 2.514 | 14.534 | 192.7  | 0.968 | 2.373 | 13.849 |
| 3  | 241.8  | 0.824 | 1.087 | 12.646 | 244.8  | 0.343 | 1.052 | 11.605 |
| 4  | 282.3  | 0.067 | 1.262 | 13.344 | 289.7  | 0.240 | 1.090 | 15.238 |
| 5  | 395.9  | 2.181 | 3.458 | 14.455 | 404.5  | 1.999 | 3.441 | 13.878 |
| 6  | 488.3  | 9.407 | 5.338 | 0.727  | 491.9  | 9.411 | 5.381 | 0.687  |
| 7  | 586.8  | 2.384 | 5.431 | 10.339 | 579.4  | 2.427 | 5.925 | 9.911  |
| 8  | 721.1  | 0.331 | 1.257 | 17.175 | 712.3  | 0.310 | 1.198 | 17.227 |

**Table S16** SINGLE\_ANISO computed wave function decomposition analysis for lowest KDs of Dy(III) ions for two crystallographic non-equivalent complexes in **1** and **2**. It is shown only main (> 10%) contributions

| KD | wave function decomposition analysis (main (> 10%) contributions)                                         |                                                                                                           |
|----|-----------------------------------------------------------------------------------------------------------|-----------------------------------------------------------------------------------------------------------|
|    | 1a                                                                                                        | 1b                                                                                                        |
| 1  | 0.948 $ \pm 15/2\rangle$                                                                                  | 0.950 $ \pm 15/2\rangle$                                                                                  |
| 2  | 0.409 $ \pm 13/2\rangle$ + 0.327 $ \pm 9/2\rangle$ + 0.195 $ \pm 5/2\rangle$                              | 0.427 $ \pm 13/2\rangle$ + 0.351 $ \pm 9/2\rangle$ + 0.173 $ \pm 5/2\rangle$                              |
| 3  | 0.301 $ \pm 7/2\rangle$ + 0.245 $ \pm 1/2\rangle$ + 0.149 $ \pm 3/2\rangle$                               | 0.350 $ \pm 7/2\rangle$ + 0.227 $ \pm 1/2\rangle$ + 0.128 $ \pm 3/2\rangle$ + 0.116 $ \pm 11/2\rangle$    |
| 4  | 0.383 $ \pm 11/2\rangle$ + 0.212 $ \pm 7/2\rangle$ + 0.149 $ \pm 3/2\rangle$                              | 0.345 $ \pm 11/2\rangle$ + 0.188 $ \pm 3/2\rangle$ + 0.161 $ \pm 7/2\rangle$ + 0.106 $ \pm 5/2\rangle$    |
| 5  | 0.454 $ \pm 13/2\rangle$ + 0.313 $ \pm 9/2\rangle$ + 0.123 $ \pm 5/2\rangle$                              | 0.461 $ \pm 13/2\rangle$ + 0.309 $ \pm 9/2\rangle$ + 0.129 $ \pm 5/2\rangle$                              |
| 6  | 0.290 $ \pm 11/2\rangle$ + 0.273 $ \pm 7/2\rangle$ + 0.189 $ \pm 5/2\rangle$<br>+ 0.163 $ \pm 9/2\rangle$ | 0.296 $ \pm 11/2\rangle$ + 0.287 $ \pm 7/2\rangle$ + 0.179 $ \pm 5/2\rangle$<br>+ 0.164 $ \pm 9/2\rangle$ |
| 7  | 0.347 $ \pm 3/2\rangle$ + 0.287 $ \pm 5/2\rangle$ + 0.155 $ \pm 11/2\rangle$ +<br>0.143 $ \pm 7/2\rangle$ | 0.352 $ \pm 3/2\rangle$ + 0.289 $ \pm 5/2\rangle$ + 0.153 $ \pm 11/2\rangle$ + 0.137 $ \pm 7/2\rangle$    |
| 8  | 0.636 $ \pm 1/2\rangle$ + 0.262 $ \pm 3/2\rangle$                                                         | 0.637 $ \pm 1/2\rangle$ + 0.260 $ \pm 3/2\rangle$                                                         |

| KD | wave function decomposition analysis (main (> 10%) contributions)                                         |                                                                                                                                     |
|----|-----------------------------------------------------------------------------------------------------------|-------------------------------------------------------------------------------------------------------------------------------------|
|    | 2a                                                                                                        | 2b                                                                                                                                  |
| 1  | 0.962 $ \pm 15/2\rangle$                                                                                  | 0.966 $ \pm 15/2\rangle$                                                                                                            |
| 2  | 0.499 $ \pm 13/2\rangle$ + 0.346 $ \pm 9/2\rangle$                                                        | 0.508 $ \pm 13/2\rangle$ + 0.366 $ \pm 9/2\rangle$ + 0.103 $ \pm 5/2\rangle$                                                        |
| 3  | 0.425 $ \pm 7/2\rangle$ + 0.292 $ \pm 11/2\rangle$ + 0.112 $ \pm 5/2\rangle$                              | 0.466 $ \pm 7/2\rangle$ + 0.384 $ \pm 11/2\rangle$                                                                                  |
| 4  | 0.284 $ \pm 3/2\rangle$ + 0.201 $ \pm 1/2\rangle$ + 0.199 $ \pm 11/2\rangle$ +<br>0.175 $ \pm 5/2\rangle$ | 0.313 $ \pm 3/2\rangle$ + 0.228 $ \pm 1/2\rangle$ + 0.225 $ \pm 5/2\rangle$ +<br>0.146 $ \pm 11/2\rangle$                           |
| 5  | 0.355 $ \pm 13/2\rangle$ + 0.321 $ \pm 9/2\rangle$ + 0.138 $ \pm 7/2\rangle$                              | 0.387 $ \pm 13/2\rangle$ + 0.334 $ \pm 9/2\rangle$ + 0.108 $ \pm 7/2\rangle$                                                        |
| 6  | 0.254 $ \pm 5/2\rangle$ + 0.202 $ \pm 11/2\rangle$ + 0.180 $ \pm 7/2\rangle$ +<br>0.123 $ \pm 9/2\rangle$ | 0.231 $ \pm 5/2\rangle$ + 0.227 $ \pm 11/2\rangle$ + 0.224 $ \pm 7/2\rangle$ +<br>0.106 $ \pm 9/2\rangle$                           |
| 7  | 0.316 $ \pm 3/2\rangle$ + 0.251 $ \pm 5/2\rangle$ + 0.157 $ \pm 7/2\rangle$ +<br>0.147 $ \pm 11/2\rangle$ | 0.319 $ \pm 3/2\rangle$ + 0.270 $ \pm 5/2\rangle$ + 0.146 $ \pm 11/2\rangle$ +<br>0.141 $ \pm 7/2\rangle$ + 0.101 $ \pm 9/2\rangle$ |
| 8  | 0.611 $ \pm 1/2\rangle$ + 0.259 $ \pm 3/2\rangle$                                                         | 0.634 $ \pm 1/2\rangle$ + 0.256 $ \pm 3/2\rangle$                                                                                   |



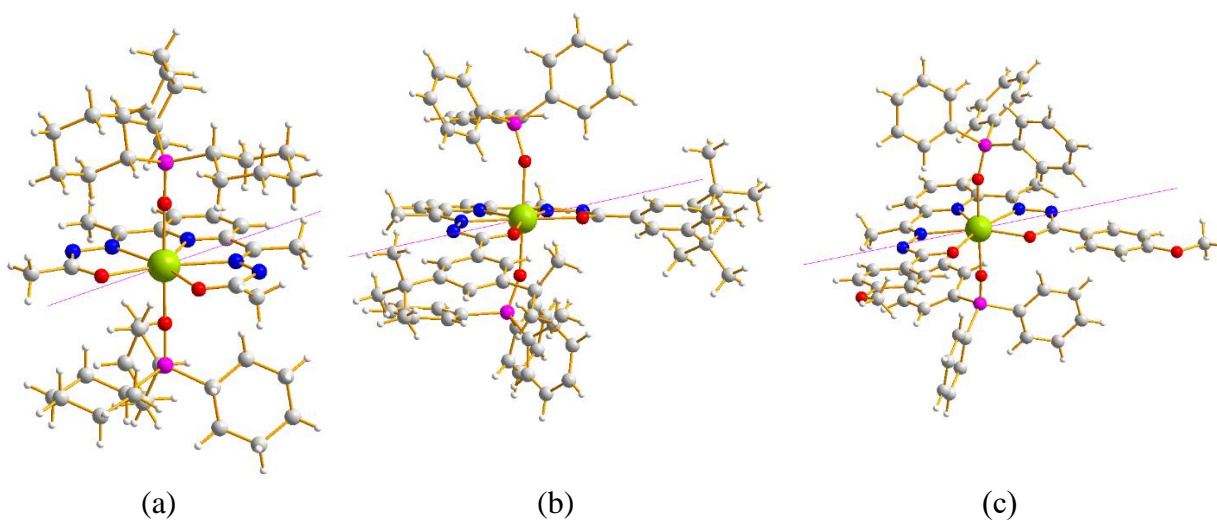

**Figure S21.** The molecular structures of **1** (a), **2** (b) and **3** (c) together with the easy axes (magenta) of ground KD obtained within the *ab initio* SA-CASSCF/RASSI-SO/SINGLE\_ANISO calculation. Color code: green = Dy, magenta = P, red = O, blue = N, gray = C, white = H.

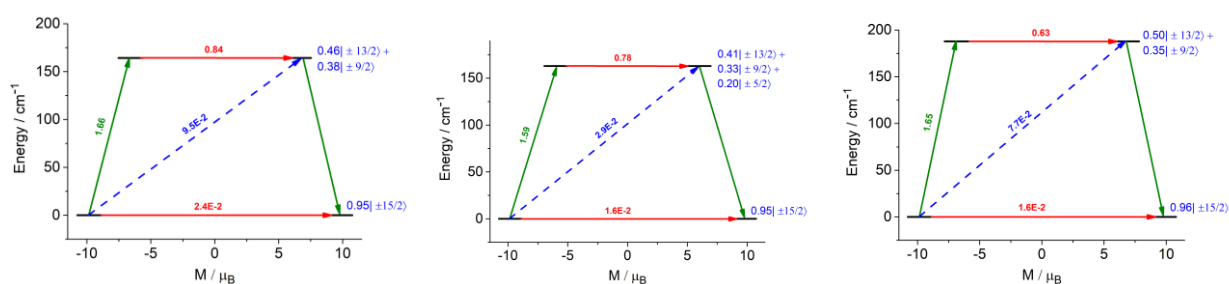

**Figure S22.** Computed possible magnetization relaxation pathways for **1** (a), **2** (b) and **3** (c). The red arrows show the QTM and TA-QTM via ground and higher excited KD, respectively. The blue arrow shows the Orbach process for the relaxation. The green arrows show the mechanism of magnetic relaxation.

**Table S17** The *ab initio* computed CF parameter of complexes **1-3**

| k | q  | $B_k^q$           |                   |                   |
|---|----|-------------------|-------------------|-------------------|
|   |    | <b>1</b>          | <b>2</b>          | <b>3</b>          |
| 2 | -2 | 0.153E+01         | -0.258E+00        | -0.125E+01        |
|   | -1 | -0.861E+00        | 0.320E-01         | 0.757E+00         |
|   | 0  | <b>-0.498E+01</b> | <b>-0.255E+01</b> | <b>-0.553E+01</b> |
|   | +1 | 0.125E+00         | 0.209E+01         | -0.301E+01        |
|   | +2 | 0.286E+00         | -0.291E+00        | 0.289E+00         |
|   | -4 | -0.259E-01        | 0.240E-03         | -0.848E-01        |
|   | -3 | -0.432E-03        | -0.612E-02        | -0.518E-01        |
| 4 | -2 | -0.329E+00        | -0.400E-03        | 0.722E-01         |
|   | -1 | -0.102E-03        | -0.722E-02        | -0.425E-01        |
|   | 0  | -0.161E-01        | -0.226E-02        | -0.153E-01        |
|   | +1 | 0.259E-02         | -0.830E-02        | 0.777E-02         |
|   | +2 | -0.282E-01        | 0.478E-01         | 0.316E+00         |
|   | +3 | 0.150E-01         | 0.122E-01         | 0.505E-02         |
|   | +4 | 0.266E+00         | -0.431E-01        | -0.244E+00        |
|   | -6 | 0.158E-02         | 0.859E-05         | 0.259E-02         |
|   | -5 | -0.318E-03        | -0.102E-04        | 0.594E-03         |
|   | -4 | 0.188E-03         | 0.743E-05         | 0.349E-03         |
| 6 | -3 | 0.474E-03         | 0.972E-04         | 0.277E-02         |
|   | -2 | 0.990E-02         | 0.325E-04         | -0.907E-03        |
|   | -1 | -0.809E-03        | 0.197E-03         | 0.488E-02         |
|   | 0  | -0.136E-02        | -0.570E-04        | -0.133E-02        |
|   | +1 | -0.109E-02        | -0.544E-04        | 0.407E-03         |
|   | +2 | 0.620E-03         | -0.392E-03        | -0.981E-02        |
|   | +3 | -0.139E-02        | 0.478E-04         | -0.241E-02        |
|   | +4 | 0.924E-03         | -0.180E-04        | -0.915E-03        |
|   | +5 | 0.243E-03         | -0.209E-03        | 0.271E-02         |
|   | +6 | 0.738E-03         | 0.116E-03         | 0.617E-03         |
